# Supplementary material for: COVID-19-related social support service closures and mental well-being in older adults and those affected by dementia: a UK longitudinal survey
Source: PubMed Central journal article supplement (PMC7813330; doi:10.1136/bmjopen-2020-045889), 2021-01-17
Supplement: bmjopen-2020-045889.draft_revisions.pdf [file bmjopen-2020-045889.draft_revisions.pdf]

# BMJ Open

BMJ Open is committed to open peer review. As part of this commitment we make the peer review history of every article we publish publicly available.

When an article is published we post the peer reviewers' comments and the authors' responses online. We also post the versions of the paper that were used during peer review. These are the versions that the peer review comments apply to.

The versions of the paper that follow are the versions that were submitted during the peer review process. They are not the versions of record or the final published versions. They should not be cited or distributed as the published version of this manuscript.

BMJ Open is an open access journal and the full, final, typeset and author-corrected version of record of the manuscript is available on our site with no access controls, subscription charges or pay-per-view fees (<http://bmjopen.bmj.com>).

If you have any questions on BMJ Open's open peer review process please email [info.bmjopen@bmj.com](mailto:info.bmjopen@bmj.com)

# BMJ Open

## COVID-19-related social support service closures and mental well-being in older adults and those affected by dementia: A UK longitudinal survey

|                               |                                                                                                                                                                                                                                                                                                                                                                                                                                                                                                                                                                                                                                                                                                                                                                                                                                                                                                                                                                                                                                                                                                                                                                                                                                                                                                                                                  |
|-------------------------------|--------------------------------------------------------------------------------------------------------------------------------------------------------------------------------------------------------------------------------------------------------------------------------------------------------------------------------------------------------------------------------------------------------------------------------------------------------------------------------------------------------------------------------------------------------------------------------------------------------------------------------------------------------------------------------------------------------------------------------------------------------------------------------------------------------------------------------------------------------------------------------------------------------------------------------------------------------------------------------------------------------------------------------------------------------------------------------------------------------------------------------------------------------------------------------------------------------------------------------------------------------------------------------------------------------------------------------------------------|
| Journal:                      | <i>BMJ Open</i>                                                                                                                                                                                                                                                                                                                                                                                                                                                                                                                                                                                                                                                                                                                                                                                                                                                                                                                                                                                                                                                                                                                                                                                                                                                                                                                                  |
| Manuscript ID                 | bmjopen-2020-045889                                                                                                                                                                                                                                                                                                                                                                                                                                                                                                                                                                                                                                                                                                                                                                                                                                                                                                                                                                                                                                                                                                                                                                                                                                                                                                                              |
| Article Type:                 | Original research                                                                                                                                                                                                                                                                                                                                                                                                                                                                                                                                                                                                                                                                                                                                                                                                                                                                                                                                                                                                                                                                                                                                                                                                                                                                                                                                |
| Date Submitted by the Author: | 27-Oct-2020                                                                                                                                                                                                                                                                                                                                                                                                                                                                                                                                                                                                                                                                                                                                                                                                                                                                                                                                                                                                                                                                                                                                                                                                                                                                                                                                      |
| Complete List of Authors:     | Giebel, Clarissa; University of Liverpool, Institute of Psychology, Health and Society<br>Pulford, Daniel; Lancashire Care NHS Foundation Trust<br>Cooper, Claudia; University College London<br>Lord, Kathryn; University of Bradford<br>Shenton, Justine; Sefton Older People's Forum<br>Cannon, Jacqui; Lewy Body Society<br>Shaw, Lisa; University of Liverpool, Institute of Psychology, Health and Society<br>Tetlow, Hilary; SURF Liverpool<br>Limbert, Stan; NIHR ARC NWC<br>Callaghan, Steve; EQE Health<br>Whittington, Rosie; Me2U Care<br>Rogers, Carol; National Museums Liverpool<br>Komuravelli, Aravind; North West Boroughs Healthcare NHS Foundation Trust<br>Rajagopal, Manoj; Lancashire Care NHS Foundation Trust<br>Eley, Ruth; Liverpool DAA<br>Downs, Murna; University of Bradford, Bradford Dementia Group<br>Reilly, Siobhan; Lancaster University, Division of Health Research<br>Riley, Emma; National Museums Liverpool<br>Ward, Kym; The Brain Charity<br>Gaughan, Anna; TIDE<br>Butchard, Sarah; University of Liverpool, Institute of Psychology, Health and Society<br>Beresford, Jules; University of Bradford<br>Watkins, Caroline; University of Central Lancashire, Faculty of Health and Wellbeing<br>Bennett, Kate; University of Liverpool, Institute of Psychology, Health and Society<br>Gabbay, Mark |
| Keywords:                     | Dementia < NEUROLOGY, COVID-19, MENTAL HEALTH, Old age psychiatry < PSYCHIATRY                                                                                                                                                                                                                                                                                                                                                                                                                                                                                                                                                                                                                                                                                                                                                                                                                                                                                                                                                                                                                                                                                                                                                                                                                                                                   |
|                               |                                                                                                                                                                                                                                                                                                                                                                                                                                                                                                                                                                                                                                                                                                                                                                                                                                                                                                                                                                                                                                                                                                                                                                                                                                                                                                                                                  |

1  
2  
3  
4  
5  
6  
7  
8  
9  
10  
11  
12  
13  
14  
15  
16  
17  
18  
19  
20  
21  
22  
23  
24  
25  
26  
27  
28  
29  
30  
31  
32  
33  
34  
35  
36  
37  
38  
39  
40  
41  
42  
43  
44  
45  
46  
47  
48  
49  
50  
51  
52  
53  
54  
55  
56  
57  
58  
59  
60

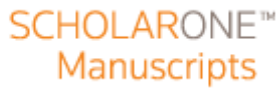

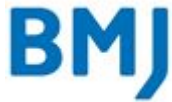

I, the Submitting Author has the right to grant and does grant on behalf of all authors of the Work (as defined in the below author licence), an exclusive licence and/or a non-exclusive licence for contributions from authors who are: i) UK Crown employees; ii) where BMJ has agreed a CC-BY licence shall apply, and/or iii) in accordance with the terms applicable for US Federal Government officers or employees acting as part of their official duties; on a worldwide, perpetual, irrevocable, royalty-free basis to BMJ Publishing Group Ltd ("BMJ") its licensees and where the relevant Journal is co-owned by BMJ to the co-owners of the Journal, to publish the Work in this journal and any other BMJ products and to exploit all rights, as set out in our [licence](#).

The Submitting Author accepts and understands that any supply made under these terms is made by BMJ to the Submitting Author unless you are acting as an employee on behalf of your employer or a postgraduate student of an affiliated institution which is paying any applicable article publishing charge ("APC") for Open Access articles. Where the Submitting Author wishes to make the Work available on an Open Access basis (and intends to pay the relevant APC), the terms of reuse of such Open Access shall be governed by a Creative Commons licence – details of these licences and which [Creative Commons](#) licence will apply to this Work are set out in our licence referred to above.

Other than as permitted in any relevant BMJ Author's Self Archiving Policies, I confirm this Work has not been accepted for publication elsewhere, is not being considered for publication elsewhere and does not duplicate material already published. I confirm all authors consent to publication of this Work and authorise the granting of this licence.

1  
2  
3  
4  
5  
6  
7

## COVID-19-related social support service closures and mental well-being in older adults and those affected by dementia: A UK longitudinal survey

8  
9  
10  
11  
12  
13  
14  
15

**Clarissa Giebel<sup>1,2,\*</sup>, Daniel Pulford<sup>3</sup>, Claudia Cooper<sup>4</sup>, Kathryn Lord<sup>5</sup>, Justine Shenton<sup>6</sup>, Jacqueline Cannon<sup>7</sup>, Lisa Shaw<sup>8</sup>, Hilary Tetlow<sup>9</sup>, Stan Limbert<sup>2</sup>, Steve Callaghan<sup>10</sup>, Rosie Whittington<sup>11</sup>, Carol Rogers<sup>12</sup>, Aravind Komuravelli<sup>13</sup>, Manoj Rajagopal<sup>3</sup>, Ruth Eley<sup>14</sup>, Murna Downs<sup>5</sup>, Siobhan Reilly<sup>5</sup>, Emma Riley<sup>12</sup>, Kym Ward<sup>15</sup>, Anna Gaughan<sup>16</sup>, Sarah Butchard<sup>17</sup>, Jules Beresford<sup>5</sup>, Caroline Watkins<sup>2,18</sup>, Kate Bennett<sup>19</sup>, Mark Gabbay<sup>1,2</sup>**

16  
17

1 Department of Primary Care & Mental Health, University of Liverpool, UK

2 NIHR ARC NWC, Liverpool, UK

3 Lancashire and South Cumbria NHS Trust, UK

4 Division of Psychiatry, UCL, UK

5 Centre for Applied Dementia Studies, University of Bradford, UK

6 Sefton Older People's Forum, Sefton, UK

7 Lewy Body Society, Wigan, UK

8 Department of Modern Languages and Cultures, University of Liverpool, UK

9 SURF Liverpool, UK

10 EQE Health, Liverpool, UK

11 Me2U Care, Liverpool, UK

12 National Museums Liverpool, UK

13 North West Boroughs NHS Trust, Warrington, UK

14 Liverpool Dementia Action Alliance, UK

15 The Brain Charity, Liverpool, UK

16 TIDE, Liverpool, UK

17 Mersey Care NHS Trust, Liverpool, UK

18 Department of Health Research, UCLAN, UK

19 School of Psychology, University of Liverpool, UK

38  
39  
40  
41  
42  
43  
44  
45  
46  
47  
48  
49  
50  
51  
52  
53  
54  
55  
56  
57  
58  
59  
60

*\*Correspondence should be addressed to:* Clarissa Giebel, Waterhouse Building, University of Liverpool, Liverpool, L69 3GL. Email: [Clarissa.giebel@liverpool.ac.uk](mailto:Clarissa.giebel@liverpool.ac.uk)

## Abstract

**Background:** The COVID-19 pandemic has had a major impact on delivery of social support services. This might be expected to particularly affect older adults and people living with dementia (PLWD), and to reduce their wellbeing.

**Aims:** To explore how social support service use by older adults, carers, and PLWD, and their mental wellbeing changed over the first three months since the pandemic outbreak.

**Methods:** Unpaid dementia carers, PLWD, and older adults took part in a longitudinal online or telephone survey collected in April-May 2020, and at two subsequent time points 6 and 12 weeks after baseline. Participants were asked about their social support service usage in a typical week prior to the pandemic (at baseline), and in the past week at each of the three time points. They also completed measures of depression, anxiety and mental well-being.

**Results:** 377 participants had complete data at all three time points. Social support service usage dropped shortly after lockdown measures were imposed at timepoint 1 (T1), to then increase again by T3. The access to paid care was least affected by COVID-19. Cases of anxiety dropped significantly across the study period, whilst cases of depression rose. Well-being increased significantly for older adults and PLWD from T1 to T3.

**Conclusions:** Access to social support services has been significantly affected by the pandemic, which is starting to recover slowly. With mental well-being differently affected across subgroups, support needs to be put in place to maintain better well-being across those vulnerable groups during the ongoing pandemic.

### Strengths and limitations of this study

- Data on social support service usage and mental health were collected at three time points in the early stages of the pandemic.
- 63% of participants completed all three survey time points.
- The survey provides a unique insight into how social care and mental health have been affected in dementia and ageing during COVID-19.
- The study was mostly completed by people from a White ethnic background, and lacks ethnic minority representation despite actively approaching community groups.

For peer review only

## Introduction

In the UK, 11.9 million people are aged 65 and over [1], with over 850,000 living with dementia [2]. Social support services, including day care centres, support groups, paid home carers, and community activities, such as singing or arts groups, are important for maintaining a good quality of life for older people and people living with dementia (PLWD) [3-4]. In view of an ageing population and increasing numbers of PLWD, easily accessible services are crucial to support people socially, as well as with their care needs.

The COVID-19 pandemic has affected these social support services significantly. Social isolation as a result of social distancing, lockdowns, and shielding is a huge concern for older people across the globe since the beginning of the pandemic [5-6], with similar issues highlighted early for PLWD [7]. However, there is still a dearth of evidence on the mental well-being and access to care for those in need.

Specifically, in the UK, a nationwide three-month lockdown was imposed on the 23<sup>rd</sup> of March. Older people were over-represented in the group who were clinically extremely vulnerable, that is at greatest risk of severe illness from COVID-19, who were asked to shield by the government until early August. All adults aged 70+ were classified as being at least moderate risk of severe illness from COVID-19 [8]. During the most restrictive, earlier period of lockdown, people were advised to only go outside once a day for essential food shopping, pharmacy visits, or to exercise. Non-essential shops were closed, and only started reopening in July. With additional social distancing for the general population, and use of personal protective equipment (PPE) for the health and social care taskforce in place, these measures significantly impact the social support services that PLWD, carers, and older adults could receive. Recent qualitative evidence has highlighted how PLWD and unpaid carers have faced a sudden crisis in terms of accessing social support services since the pandemic [9], and have faced difficult decisions whether to continue or discontinue paid carers entering the home of the PLWD, for fear of potential virus transmission [10]. Whilst these qualitative accounts provide rich information on the experiences of having accessed (or failed to access) social support services during the pandemic, there appears to be no empirical evidence to date quantifying those experiences and linking these with mental well-being.

The aim of this study was to explore the impacts of COVID-19 on social support service closures and longitudinal changes in the mental illness and well-being of older adults, PLWD, and unpaid carers.

## Methods

### Participants and recruitment

We recruited UK residents who were aged 18+. PLWD were eligible to take part if they had a diagnosis of dementia. Unpaid carers were eligible to take part if they were or had been caring for a relative or friend with dementia. Older adults were eligible to take part if they were aged 65 years or older.

Participants were recruited via different social support services third sector organisations, such as peer support group organisations, carer networks, cultural dementia training programme organisations, and national dementia subtype specific organisations, and



1  
2  
3 by contacting people on their email circulation lists, via newsletters and social media accounts.  
4 We also directly contacted people who were accessing regular services, such as support  
5 groups or older people fora, via telephone. This ensured that people without internet access  
6 were able to participate in this research. We also utilised *Join Dementia Research*, a UK-wide  
7 national online register of PLWD, carers, older adults, and health volunteers who are  
8 interested in taking part in dementia and ageing research.  
9

10 Ethical approval was obtained from the University of Liverpool prior to study begin [Ref:  
11 7626].  
12  
13

#### 14 **Data collection**

15 The study was completed at three time points (T1, T2, T3), 5 and 6 weeks apart, respectively.  
16 Participants could complete the survey either online or over the phone with a research team  
17 member who entered their details into the online survey on their behalf. Participants from T1  
18 (baseline) were followed-up with the same mental well-being questionnaires at T2 and T3 and  
19 were followed-up either by telephone or email, depending on how they completed T1 survey.  
20 T1 ran from 17<sup>th</sup> April to 15<sup>th</sup> May (+/- 3 days). T2 ran from 29<sup>th</sup> May to 26<sup>th</sup> June (+/- 3 days).  
21 T3 ran from 10<sup>th</sup> July to 7<sup>th</sup> August (+/- 3 days).  
22  
23  
24

#### 25 **Variables and tools**

26 At T1, participants were asked about their background characteristics (including age, gender,  
27 ethnicity, postcode, living situation, type of dementia (if applicable), and employment).  
28 Postcode data were collected to generate an Index of Multiple Deprivation (IMD) quintile. IMD  
29 provides a measure of neighbourhood deprivation, taking into account income, education,  
30 crime, and health, amongst others. Quintile 1 indicates least deprived neighbourhoods, with  
31 quintile 5 indicating the most deprived neighbourhoods.  
32  
33

34 Service usage was measured by asking about pre-pandemic and current receipt of  
35 different social support services (including paid carers, support groups, befrienders, day care  
36 centres, respite, meal deliveries, transport, social activities, clinical mental health support, and  
37 clinical physical support) and equipment, such as hand rails or shower seats, as well as the  
38 weekly total hours of social support services. Pre-pandemic service usage was defined as use  
39 of social support services in a typical week before the pandemic.  
40

41 Participants were also asked to complete the Personalised Health Questionnaire 9  
42 (PHQ-9) [11] for depression, the Generalised Anxiety Disorder 7 (GAD-7) [12] for anxiety, and  
43 the Short Warwick-Edinburgh Mental Well-Being Scale [13] (SWEMWBS) for quality of life.  
44 Higher scores on the PHQ-9, GAD-7, and the SWEMWBS indicated higher levels of  
45 depression, anxiety, and quality of life, respectively. We categorised participants who scored  
46 of 10 or more on the PHQ-9 as 'depressed' and on the GAD-7 as 'anxious' [14]. At T2 and T3,  
47 participants were asked again about their current levels of social support service receipt,  
48 weekly hours of support, equipment, as well as the PHQ-9, GAD-7, and SWEMWBS.  
49  
50

#### 51 **Data analysis**

52 Data were analysed using SPSS 25, and the significance level was set at  $p < 0.05$ . Participant  
53 demographic characteristics and social support service usage and mental well-being variables  
54 were analysed using frequency analysis. Chi-square tests were used to assess variations in  
55 the proportions of participants who were categorised as 'depressed' or 'anxious'. Repeated  
56 measures ANOVAs with Greenhouse Geisser posthoc correction were used to analyse  
57 differences between T1, T2, and T3 in GAD-7 total, PHQ-9 total, and SWEMWBS total scores.  
58  
59  
60

1  
2  
3 For this analysis, only participants with complete GAD-7, PHQ-9, and SWEMWBS were  
4 included (n=377).  
5  
6  
7  
8  
9

## 10 **Public involvement**

11 Unpaid carers and a PLWD were involved as equal team members in all aspects of the study  
12 – from conceptualisation and design through to analysis and dissemination.  
13  
14

## 15 **Results**

### 16 **Survey completion**

17 Figure 1 outlines the participant flow and completion rates in further detail. 569 participants  
18 completed the survey at T1 (61 PLWD; 219 current carers; 66 former carers; 223 older adults).  
19 420 participants completed the survey at T2 (38 PLWD; 168 current carers; 45 former carers;  
20 169 older adults). 377 participants completed all three waves of the survey (37 PLWD; 147  
21 current carers; 42 former carers; 148 older adults).  
22  
23  
24  
25

### 26 **Participant characteristics**

27 Table 1 shows the demographic characteristics of those who completed T1 and those that  
28 completed all three survey time points, by subgroup. For those who completed all three time  
29 points, carers and older adults were mostly female (59-82%), whilst the majority of PLWD  
30 were male (62%). The majority of participants were from a White ethnic background (95-99%)  
31 and lived with someone else (61-88%), with current carers having the highest proportion of  
32 living with someone else. The majority of participants across all four subgroups lived in less  
33 deprived neighbourhoods (Quintiles 1 and 2) (52-61%). Thirty-seven PLWD took part in all  
34 three time points; the most common diagnostic subtype was Alzheimer's disease.  
35  
36

37 *[Figure 1 and Table 1]*

### 38 **Social support service and activities usage**

39 Participants had accessed a range of social support services pre-pandemic, including day  
40 care centres, support groups, meal deliveries, respite, and paid carers. Figure 2 (A) shows the  
41 proportion of participants of the total sample (n=377) who reported accessing paid carers,  
42 support groups, day care, befrienders, and social activities prior to the pandemic, and at T1,  
43 T2, and T3. These were the most commonly used types of social support services prior to the  
44 pandemic. Social support services usage had dropped since the pandemic outbreak. Pre-  
45 pandemic, 27% of participants accessed social activities in the community, which dropped to  
46 6% at T1, T2, and T3. Paid care saw the smallest change – with 17% having accessed paid  
47 carers pre-pandemic, dropping to 12% at T1 and increasing slightly again to 15% at T3. Day  
48 care saw the largest drop, with only 1-2 % receiving day care since the outbreak, compared  
49 to 15% previously.  
50  
51

52 Figure 2 (B) shows the proportion of participants by group who have received any form  
53 of social support services pre-pandemic and at all three survey time points. Pre-pandemic,  
54 90% of current carers had received social support of any form, with between 45% and 50% of  
55 former carers and older adults having received some support. This decreased at T1 for all  
56 subgroups to between 20% (older adults) to 55% (current carers) receiving some type of  
57 support. Through T2 and T3, an upward trend emerged with more participants gaining access  
58 to some services again, with levels for PLWD and former carers being higher at T3 than at  
59 pre-pandemic levels.  
60

**[Figure 2]****Mental well-being**

Figure 3 shows the proportion of participants across the total sample (n=377) who were categorised as anxious and depressed across all three time points. For anxiety, we noted a downward trend in number of cases from T1 (16.5%) to T3 (14.1%). The proportion of participants with anxiety was significantly lower at T2 ( $\chi^2=186.399$ ,  $p<0.001$ ) and T3 ( $\chi^2=136.562$ ,  $p<0.001$ ) compared to T1. For depression, we noted an upward trend in cases from T1 (14.4%) to T3 (17.5%). The proportion of participants with depression was significantly higher at T2 ( $\chi^2=176.248$ ,  $p<0.001$ ) and T3 ( $\chi^2=158.031$ ,  $p<0.001$ ) compared to T1.

Figure 4 shows the median of the GAD-7, PHQ-9, and SWEMWBS total scores by group over time for those who completed all three survey time points. Based on the median scores, levels of anxiety and depression appear to decrease from T1 to T3, whilst quality of life increases from T1 to T3.

For anxiety, repeated-measures ANOVAs with Greenhouse-Geisser posthoc correction showed that GAD-7 total scores did not vary significantly from T1 to T3 for PLWD [ $F(1.856, 64.962)=1.429$ ,  $p=0.247$ ] or among current carers [ $F(1.898, 277.063)=1.938$ ,  $p=0.148$ ], former carers [ $F(1.801, 68.419)=.139$ ,  $p=.139$ ], or older adults [ $F(1.924, 286.727)=2.688$ ,  $p=.0072$ ], based on those participants who completed in all three survey time points.

For depression, repeated-measures ANOVAs showed that PHQ-9 total scores did not significantly vary from T1 to T3 for PLWD [ $F(1.896, 66.370)=1.461$ ,  $p=0.240$ ], current carers [ $F(1.900, 277.453)=.639$ ,  $p=0.521$ ], former carers [ $F(1.677, 68.419)=.024$ ,  $p=0.960$ ], or older adults [ $F(1.889, 281.414)=.857$ ,  $p=0.420$ ].

For well-being, repeated-measures ANOVAs showed that SWEMWBS total scores significantly increased from T1 to T3 for PLWD [ $F(1.726, 60.423)=5.412$ ,  $p<0.05$  [Mean(SD) T1-T3= 22.1(6.4); 24.3(5.6); 24.4(5.6)]] and older adults [ $F(1.804, 268.807)=3.632$ ,  $p<0.05$  [Mean(SD) T1-T3= 27.5(5.1); 28.0(5.1); 28.3(4.9)]]. However there were no significant changes among current [ $F(1.982, 289.325)=2.185$ ,  $p=0.115$ ] or former carers [ $F(1.728, 63.725)=.268$ ,  $p=0.733$ ].

**[Figure 3 and 4]****Discussion**

This is one of the first studies to show that social support service usage in dementia and ageing reduced significantly compared to pre-pandemic levels, whilst slowly rising in the months post-nationwide lockdown. In addition, we also show that cases of anxiety reduced whilst cases of depression increased in the months since lockdown, with quality of life significantly increasing for PLWD and older adults only.

Social support service usage for PLWD, unpaid carers, and older adults has seen a significant decrease since the COVID-19 pandemic, leaving many people suddenly without vital support – ranging from day care centres to respite to support groups. In the months following the nationwide lockdown, usage has gradually increased again but varied among providers and type of support. With public health restrictions still remaining in place however during that period, including social distancing, shielding and thus inability to meet members of different households, such support is most likely to be implemented via digital technologies. Considering that in our sample 94% of participants completed the survey online rather than the telephone option, nearly all participants had access to the internet. However, many older adults and PLWD are less likely to be digitally literate [15], making it difficult for all people to access services equally. This has already been an issue pre-COVID-19 [16], suggesting that the pandemic has further exacerbated potential inequalities in access and thus further isolated people who would benefit from social support the most.

1  
2  
3  
4 One type of support which has been affected the least by the pandemic has been paid  
5 home care. Receiving paid home care enables PLWD and older adults to stay at home  
6 independently for longer – as people wish to avoid entering a care home and stay in their  
7 familiar environment [17]. Whilst there was a reduction in paid home care usage compared to  
8 pre-pandemic levels, overall paid home carers were utilised the most. A qualitative exploration  
9 into decision-making for whether or not to continue paid home care during the pandemic has  
10 shown that many unpaid carers were afraid of having paid carers enter the home (often with  
11 inadequate PPE) for risk of potential virus transmission [10]. Other unpaid carers however felt  
12 unable to cope without the support, or indeed accepted the potential risks, and continued paid  
13 home care. There is also a notable difference between social care provision (which is paid  
14 home care) and third sector care provision (which involves support groups and social activities  
15 for example). The third sector relies on volunteers providing services, and has also suffered  
16 during the pandemic, whereas the social care sector is financially supported by the  
17 government. Therefore, the ability to receive home care might not have been affected to the  
18 same extent as accessing support groups for instance. Another potential reason for variations  
19 in usage between activity types is that home care involves someone from the outside entering  
20 someone's home. In contrast, day care centres, respite care, and social activities involve older  
21 adults and PLWD going outside to larger social gatherings. Due to public health restrictions,  
22 these have been temporarily rendered largely, if not completely, impossible to take place in  
23 their original face-to-face formats. As numbers of infections rise again, these restrictions are  
24 being strengthened and re-imposed with large fines possible for those transgressing them.

25  
26  
27 Anxiety, depression, and well-being changed over the course of the study period. Over  
28 12 weeks, cases of anxiety across the total sample dropped, whilst cases of depression  
29 increased significantly. However, when exploring levels of anxiety and depression within  
30 groups, no significant changes were noted, which is likely to have been due to small and varied  
31 sample sizes for each subgroup. This may be because people who were very depressed or  
32 anxious might not have continued the follow-up surveys. It is also possible though that  
33 participants felt more connected over time, particularly considering again that the majority of  
34 participants completed the survey online and thus were able to participate in remote services,  
35 where these existed. Recent evidence from Spain showed how older adults were less likely to  
36 suffer from psychological distress as a result of the pandemic than people aged below 60 [18].  
37 Nevertheless, overall the pandemic is having a heightened impact on the mental health of the  
38 general population [19-20]. Engaging in social activities can be one avenue to help maintain  
39 good mental health [21]. Considering that reductions in social engagement both before and  
40 after a dementia diagnosis are common [22], enabling continued engagement throughout the  
41 pandemic is important to support PLWD, carers, and older adults adequately. This is  
42 corroborated by evidence from the baseline survey showing that reductions in social support  
43 usage were linked to mental well-being [23]. It is possible that for this study, merging  
44 subgroups of older adults, PLWD, and carers resulted in no significant associations, as each  
45 group was differently affected, as indicated by looking at changes of mental well-being for  
46 each group across the 12 weeks.

47  
48  
49 There were some limitations to our study. Whilst benefitting from a large sample size  
50 and good retention rate over a relatively short time period of 12 weeks, the majority of  
51 participants had internet access and were thus also able to join in remote social support.  
52 Although we actively approached older adults, PLWD, and carers via phone through recruiting  
53 organisations, only some people took part over the phone. It is likely however that those  
54 people without internet access have been even more isolated through the pandemic, with  
55 potentially severe mental health needs, which we have only captured a snapshot of. This also  
56 links to the fact that there are likely to be longer-term effects on mental well-being, with our  
57 survey only providing a snap shot of the first few months since the start of the pandemic.  
58 Equally, our survey did not include pre-pandemic levels of mental well-being (anxiety,  
59  
60

1  
2  
3 depression, and quality of life), which would have provided additional insight into changes in  
4 mental well-being. However, due to the unforeseen circumstance of the pandemic, it was not  
5 feasible to collect these data. We only enquired about weekly hours of total social support  
6 usage, and not for each specific type of activity. Some participants might have accessed, for  
7 example, paid home care, but only for two hours as opposed to others who might have  
8 received 40 hours a week. We are thus unable to state in detail how the pandemic has affected  
9 the level of each different type of support, but instead we provide a more general overview of  
10 activities and general service usage variations since the nationwide lockdown, which to  
11 existing knowledge has not been captured elsewhere.  
12  
13

## 14 **Conclusions**

15  
16 The pandemic is having a sudden and severe long-term impact on social support service  
17 usage for older adults and people affected by dementia, which sees somewhat of a limited  
18 increase in usage over the first few months since nationwide lockdown. Whilst it appears that  
19 some services have started providing remote support, not everyone will be able to access  
20 these, leaving many people without much needed support. Future research needs to assess  
21 how older adults and people affected by dementia are accessing social support services in  
22 the time of COVID-19, with clearer support for people to access any format of services – either  
23 face-to-face or remotely. Considering that the pandemic is going to continue for the  
24 foreseeable future, the mental health of older adults and those affected by dementia needs to  
25 be closely monitored, particularly when more stringent public health measures are put in place  
26 again.  
27  
28  
29  
30  
31  
32  
33  
34  
35  
36  
37  
38  
39  
40  
41  
42  
43  
44  
45  
46  
47  
48  
49  
50  
51  
52  
53  
54  
55  
56  
57  
58  
59  
60

**Conflicts of interest**

None.

**Acknowledgements**

This study would not have been possible without our participants, thank you very much. We also wish to thank Join Dementia Research for helping us recruit to our study.

**Funding**

This research is supported by a grant awarded to the authors by the University of Liverpool COVID-19 Strategic Research Fund in 2020. This is also independent research funded by the National Institute for Health Research Applied Research Collaboration North West Coast (ARC NWC). The views expressed in this publication are those of the author(s) and not necessarily those of the National Institute for Health Research or the Department of Health and Social Care. The University of Bradford QR Research Fund also supported part of this study. There are no grant numbers.

Or peer review only

## Figure Captions

### Figure 1. Flow of participation in longitudinal survey

**NOTE.** The top boxes indicate how many people completed each survey time point. After having removed duplicates, missing cases (where participants had not completed the PHQ-9, GAD-7, and the SWEMWBS or had missing ID codes at T2 and T3), and those that had completed T2 and T3 but had not completed T1, 377 cases remained in total. Grey boxes indicate the breakdown by subgroup.

<sup>1</sup> Follow-up completion by subgroup by percentage at T2 and T3 compared to T1: PLWD 69%(T2), 67%(T3); Current Carers 86%(T2), 75%(T3); Former carers 64%(T2), 60%(T3); Older adults 79%(T2), 69%(T3).

### Figure 2. Social support service usage pre-pandemic and at 3 survey time points

**Note.** (A) Service usage for the total sample (N=377) in proportion of participants at four different time points for some of the most frequently used support services. (B) Proportion of participants within each group at four different timepoints (pre-pandemic, T1, T2, T3) having received any form of social support.

### Figure 3. Proportion of the total sample who scored above the cut offs for anxiety and depression at three time points

**NOTE.** T = Time point

The graph shows the proportion of participants from the total sample who completed all three surveys (n=377) and scored above the cut off on the GAD-7 and PHQ-9 for anxiety and depression, respectively.

### Figure 4. Variations in anxiety, depression, and quality of life total scores at 3 time points

**NOTE.** Figures show the median total score at each time point (T1, T2, T3) for each subgroup – for anxiety (GAD-7), depression (PHQ-9), and quality of life (SWEMWBS).

## References

- [1] Office for National Statistics (ONS). *Living longer: is age 70 the new age 65?* London, England 2019: ONS.
- [2] Alzheimer's Society. *Dementia UK: An Update*. London, England: Alzheimer's Society 2014.
- [3] Skingley A, Martin A, Clift S. The contribution of community singing groups to the well-being of older people: participant perspectives from the United Kingdom. *Journal of Applied Gerontology* 2016;35(12):1302-1324.
- [4] Tretteteig S, Vatne S, Mork Rokstad AM. The influence of day care centres designed for people with dementia on family caregivers – a qualitative study. *BMC Geriatrics* 2017;17(5).
- [5] Armitage R, Nellums LB. COVID-19 and the consequences of isolating elderly. *LANCET Public Health* 2020; 5(5):doi: 10.1016/S2468-2667(20)30061-X
- [6] Berg-Weger M, Morley JE. Loneliness and social isolation in older adults during the COVID-19 pandemic: implications for gerontological social work. *Journal of Nutrition, Health & Ageing* 2020;24(5):456-458.
- [7] Brown EE, Kumr S, Rajji TK, et al. Anticipating and mitigating the impact of the COVID-19 pandemic on Alzheimer's disease and related dementias. *American Journal of Geriatric Psychiatry* 2020;28(7):712-721.
- [8] Public Health England (PHE). *Guidance on shielding and protecting people who are clinically extremely vulnerable from COVID-19*. London, England 2020: PHE. Last accessed 22<sup>nd</sup> September 2020: <https://www.gov.uk/government/publications/guidance-on-shielding-and-protecting-extremely-vulnerable-persons-from-covid-19/guidance-on-shielding-and-protecting-extremely-vulnerable-persons-from-covid-19#definition>
- [9] Giebel C, Cannon J, Hanna K, et al. Impact of Covid-19 related social support service closures on people with dementia and unpaid carers: A qualitative study. *Aging & Mental Health* 2020a; doi: 10.1080/13607863.2020.1822292
- [10] Giebel C, Hanna K, Cannon J, et al. Decision-making for receiving paid home care for dementia in the time of COVID-19: A qualitative study. *BMC Geriatrics* 2020b; doi: 10.1186/s12877-020-01719-0
- [11] Kroenke K, Spitzer RL, Williams JB. The PHQ-9: validity of a brief depression severity measure. *Journal of General Internal Medicine* 2001;16(9):606-613.
- [12] Spitzer RL, Kroenke K, Williams JB, Loewe B. A brief measure for assessing generalized anxiety disorder: the GAD-7. *Archives of Internal Medicine* 2006;166(10):1092-1097.
- [13] Haver A, Akerjordet K, Caputi P, et al. Measuring mental well-being: A validation of the Short Warwick-Edinburgh Mental Well-Being Scale in Norwegian and Swedish. *Scandinavian Journal of Public Health* 2015;43(7):721-727.
- [14] Smith, B.W., Epstein, E.E., Ortiz, J.A., Christopher, P.K., & Tooley, E.M. (2013). The Foundations of Resilience: What are the critical resources for bouncing back from stress? In Prince-Embury, S. & Saklofske, D.H. (Eds.), *Resilience in children*,



- 1  
2  
3 *adolescents, and adults: Translating research into practice*, The Springer series on  
4 human exceptionality (pp. 167-187). New York, NY: Springer.  
5
- 6 [15] Hill R, Betts LR, Gardner SE. Older adults' experiences and perceptions of digital  
7 technology: (Dis)empowerment, wellbeing, and inclusion. *Computers in Human*  
8 *Behavior* 2015;48: 415-423.  
9
- 10 [16] Stephan A, Bieber A, Hopper L, et al. Barriers and facilitators to the access to and use  
11 of formal dementia care: findings of a focus group study with people with dementia,  
12 informal carers and health and social care professionals in eight European countries.  
13 *BMC Health Services Research* 2018; 131: doi: 10.1186/s12877-018-0816-1  
14
- 15 [17] Rapaport P, Burton A, Leverton M, et al. "I just keep thinking that I don't want to rely  
16 on people." A qualitative study of how people living with dementia achieve and maintain  
17 independence at home: stakeholder perspectives *BMC Geriatrics* 2020; doi:  
18 10.1186/s12877-019-1406-6  
19
- 20 [18] Garcia-Portilla P, de la Fuente Tomas L, Bobes-Bascaran T, et al. Are older adults  
21 also at higher psychological risk from COVID-19? *Aging & Mental Health* 2020; doi:  
22 10.1080/13607863.2020.1805723  
23
- 24 [19] Fancourt D, Steptoe A, Bu F. Trajectories of depression and anxiety during enforced  
25 isolation due to COVID-10: longitudinal analyses of 59,318 adults in the UK with and  
26 without diagnosed mental illness. *medRxiv preprint* 2020; doi:  
27 10.1101/2020.06.03.20120923  
28
- 29 [20] Iob E, Steptoe A, Fancourt D. Abuse, self-harm and suicidal ideation in the UK during  
30 the COVID-19 pandemic. *British Journal of Psychiatry* 2020; doi:  
31 10.1192/bjp.2020.130  
32
- 33 [21] Holtfreter K, Reisig MD, Turanovic JJ. Depression and infrequent participation in social  
34 activities among older adults: the moderating role of high-quality familial ties. *Aging &*  
35 *Mental Health* 2017;21(4): 10.1080/13607863.2015.1099036  
36
- 37 [22] Hackett RA, Steptoe A, Cadar D, Fancourt D. Social engagement before and after  
38 dementia diagnosis in the English Longitudinal Study of Ageing. *PLOS One* 2019; doi:  
39 10.1371/journal.pone.0220195  
40
- 41 [23] Giebel C, Lord K, Cooper C, et al. A UK survey of COVID-19 related social support  
42 service closures and the effects on older people, people with dementia, and carers.  
43 *International Journal of Geriatric Psychiatry* 2020c; doi: 10.1002/gps.5434  
44  
45  
46  
47  
48  
49  
50  
51  
52  
53  
54  
55  
56  
57  
58  
59  
60

Table 1. Participant characteristics of those completing T1 survey and those completing all three survey time points

|                           | T1 (n=569)             |                        |                        |                       | T1, 2 and 3 (n=377)    |                        |                        |                       |
|---------------------------|------------------------|------------------------|------------------------|-----------------------|------------------------|------------------------|------------------------|-----------------------|
|                           | PLWD (n=61)            | Current carers (n=219) | Former carers (n=66)   | Older adults (n=223)  | PLWD (n=37)            | Current carers (n=149) | Former carers (n=39)   | Older adults (n=152)  |
| <b>N(%)</b>               |                        |                        |                        |                       |                        |                        |                        |                       |
| <b>Gender</b>             |                        |                        |                        |                       |                        |                        |                        |                       |
| <b>Female</b>             | 27 (44.3)              | 168 (77.1)             | 55 (83.3)              | 137 (61.7)            | 14 (37.8)              | 118 (79.7)             | 32 (82.1)              | 90 (59.2)             |
| <b>Male</b>               | 34 (55.7)              | 50 (22.9)              | 11 (16.7)              | 85 (38.3)             | 23 (62.2)              | 30 (20.3)              | 7 (17.9)               | 62 (40.8)             |
| <b>Ethnicity</b>          |                        |                        |                        |                       |                        |                        |                        |                       |
| <b>White</b>              | 58 (96.7)              | 211 (96.3)             | 65 (98.5)              | 216 (98.2)            | 35 (94.6)              | 143 (96.0)             | 38 (97.4)              | 148 (98.7)            |
| <b>Other</b>              | 2 (3.4)                | 8 (3.7)                | 1 (1.5)                | 4 (1.9)               | 2 (5.4)                | 6 (4.0)                | 1 (2.6)                | 2 (1.3)               |
| <b>Living situation</b>   |                        |                        |                        |                       |                        |                        |                        |                       |
| <b>Alone</b>              | 13 (21.3)              | 33 (15.1)              | 17 (26.2)              | 79 (35.6)             | 8 (21.6)               | 18 (12.2)              | 11 (28.9)              | 59 (39.1)             |
| <b>With someone</b>       | 48 (78.7)              | 185 (84.9)             | 48 (73.8)              | 143 (64.4)            | 29 (78.4)              | 130 (87.8)             | 27 (71.1)              | 92 (60.9)             |
| <b>IMD Quintile</b>       |                        |                        |                        |                       |                        |                        |                        |                       |
| <b>1</b>                  | 12 (23.1)              | 54 (32.1)              | 10 (19.2)              | 61 (33.5)             | 5 (16.1)               | 35 (31.0)              | 6 (19.4)               | 39 (31.7)             |
| <b>2</b>                  | 16 (30.8)              | 50 (29.8)              | 20 (38.5)              | 44 (24.2)             | 11 (35.5)              | 34 (30.1)              | 11 (35.5)              | 29 (23.6)             |
| <b>3</b>                  | 10 (19.2)              | 32 (19.0)              | 14 (26.9)              | 37 (20.3)             | 6 (19.4)               | 20 (17.7)              | 9 (29.0)               | 26 (21.1)             |
| <b>4</b>                  | 10 (19.2)              | 14 (8.3)               | 5 (9.6)                | 26 (14.3)             | 5 (16.1)               | 11 (9.7)               | 4 (12.9)               | 18 (14.6)             |
| <b>5</b>                  | 4 (7.7)                | 18 (10.7)              | 3 (5.8)                | 14 (7.7)              | 4 (12.9)               | 13 (11.5)              | 1 (3.2)                | 11 (8.9)              |
| <b>Type of dementia</b>   |                        |                        |                        |                       |                        |                        |                        |                       |
| <b>Alzheimer's</b>        | 20 (32.8)              | 100 (46.5)             | 6 (23.1)               |                       | 14 (37.8)              | 75 (50.7)              | 2 (20.0)               |                       |
| <b>Mixed</b>              | 13 (21.3)              | 49 (22.8)              | 7 (26.9)               |                       | 6 (16.2)               | 34 (23.0)              | 4 (40.0)               |                       |
| <b>Vascular</b>           | 11 (18.0)              | 27 (12.6)              | 4 (15.4)               |                       | 8 (21.6)               | 18 (12.2)              | 3 (30.0)               |                       |
| <b>Other</b>              | 17 (27.9)              | 39 (18.1)              | 9 (34.5)               |                       | 9 (24.3)               | 21 (14.1)              | 1 (10.0)               |                       |
| <b>Mean (SD), [Range]</b> |                        |                        |                        |                       |                        |                        |                        |                       |
| <b>Age</b>                | 70 (+/-10),<br>[45-88] | 61 (+/-13),<br>[23-89] | 64 (+/-14),<br>[22-95] | 72 (+/-6),<br>[65-90] | 72 (+/-10),<br>[50-88] | 62 (+/-13),<br>[23-89] | 65 (+/-13),<br>[22-95] | 73 (+/-6),<br>[65-90] |
| <b>Years of education</b> | 15 (+/-4),<br>[4-25]   | 16 (+/-4),<br>[6-28]   | 17 (+/-4),<br>[10-29]  | 17 (+/-4),<br>[7-25]  | 13 (+/-4),<br>[4-20]   | 16 (+/-4),<br>[6-28]   | 16 (+/-4),<br>[10-29]  | 16 (+/-4),<br>[7-24]  |

**NOTE.** 569 participants completed the survey at T1, with duplicates and missing cases removed. 377 participants had completed all three survey time points, with duplicates and missing cases removed.

PLWD – People living with dementia

1  
2  
3  
4  
5  
6  
7  
8  
9  
10  
11  
12  
13  
14  
15  
16  
17  
18  
19  
20  
21  
22  
23  
24  
25  
26  
27  
28  
29  
30  
31  
32  
33  
34  
35  
36  
37  
38  
39  
40  
41  
42  
43  
44  
45  
46  
47  
48  
49  
50  
51  
52  
53  
54  
55  
56  
57  
58  
59  
60

For peer review only

**Figure 1. Flow of participation in longitudinal survey**

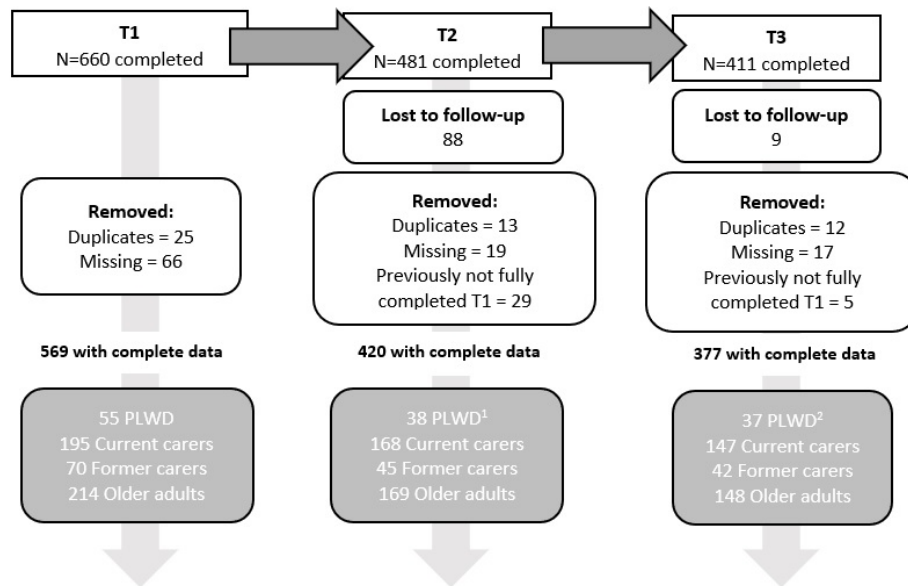

151x102mm (144 x 144 DPI)

1  
2  
3  
4  
5  
6  
7  
8  
9  
10  
11  
12  
13  
14  
15  
16  
17  
18  
19  
20  
21  
22  
23  
24  
25  
26  
27  
28  
29  
30  
31  
32  
33  
34  
35  
36  
37  
38  
39  
40  
41  
42  
43  
44  
45  
46  
47  
48  
49  
50  
51  
52  
53  
54  
55  
56  
57  
58  
59  
60

Figure 2. Social support service usage pre-pandemic and at 3 survey time points

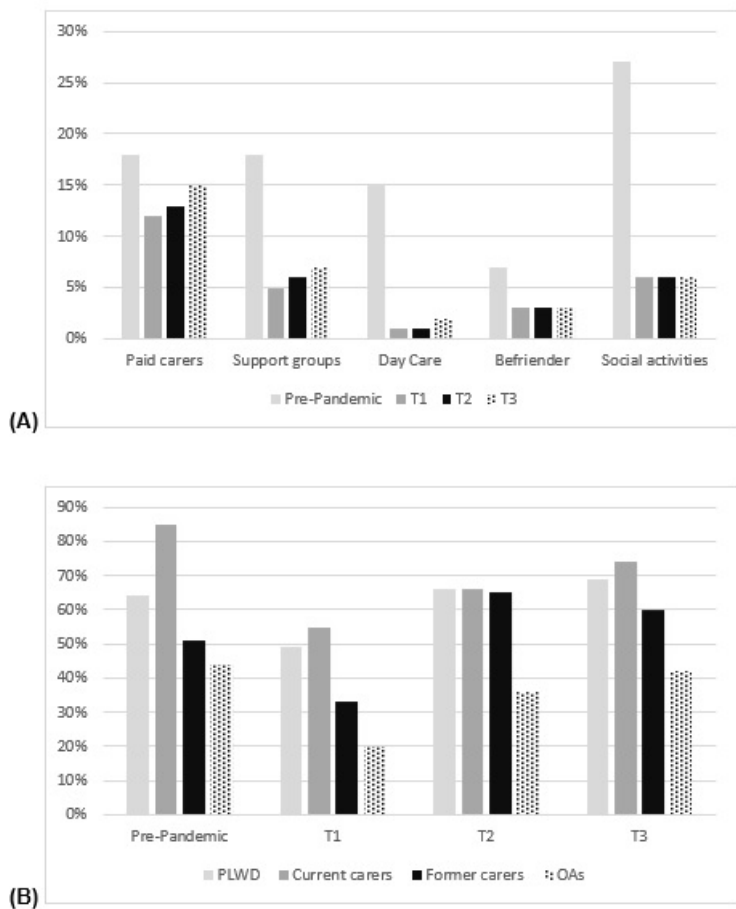

109x112mm (144 x 144 DPI)

Figure 3. Proportion of the total sample who scored above the cut offs for anxiety and depression at three time points

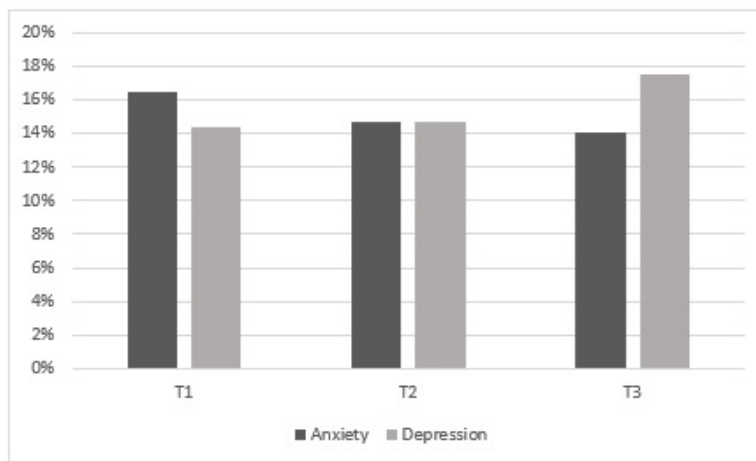

100x54mm (144 x 144 DPI)

**Figure 4. Variations in anxiety, depression, and quality of life total scores at 3 time points**

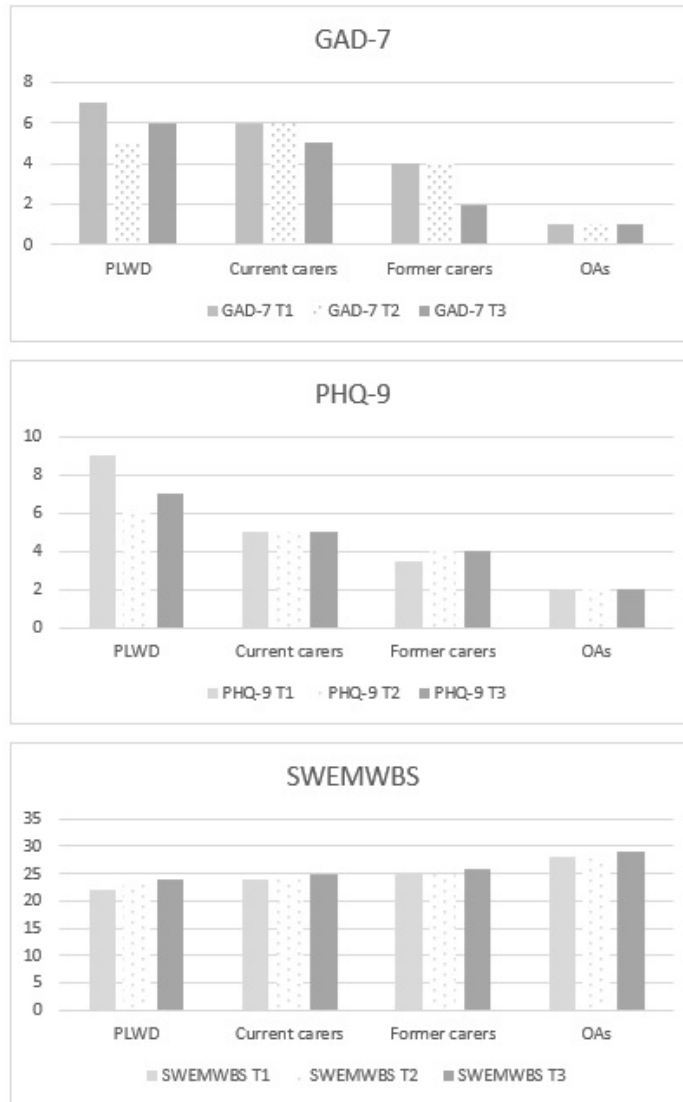

101x121mm (144 x 144 DPI)

# BMJ Open

## COVID-19-related social support service closures and mental well-being in older adults and those affected by dementia: A UK longitudinal survey

|                                 |                                                                                                                                                                                                                                                                                                                                                                                                                                                                                                                                                                                                                                                                                                                                                                                                                                                                                                                                                                                                                                                                                                                                                                                                                                                                                                           |
|---------------------------------|-----------------------------------------------------------------------------------------------------------------------------------------------------------------------------------------------------------------------------------------------------------------------------------------------------------------------------------------------------------------------------------------------------------------------------------------------------------------------------------------------------------------------------------------------------------------------------------------------------------------------------------------------------------------------------------------------------------------------------------------------------------------------------------------------------------------------------------------------------------------------------------------------------------------------------------------------------------------------------------------------------------------------------------------------------------------------------------------------------------------------------------------------------------------------------------------------------------------------------------------------------------------------------------------------------------|
| Journal:                        | <i>BMJ Open</i>                                                                                                                                                                                                                                                                                                                                                                                                                                                                                                                                                                                                                                                                                                                                                                                                                                                                                                                                                                                                                                                                                                                                                                                                                                                                                           |
| Manuscript ID                   | bmjopen-2020-045889.R1                                                                                                                                                                                                                                                                                                                                                                                                                                                                                                                                                                                                                                                                                                                                                                                                                                                                                                                                                                                                                                                                                                                                                                                                                                                                                    |
| Article Type:                   | Original research                                                                                                                                                                                                                                                                                                                                                                                                                                                                                                                                                                                                                                                                                                                                                                                                                                                                                                                                                                                                                                                                                                                                                                                                                                                                                         |
| Date Submitted by the Author:   | 15-Dec-2020                                                                                                                                                                                                                                                                                                                                                                                                                                                                                                                                                                                                                                                                                                                                                                                                                                                                                                                                                                                                                                                                                                                                                                                                                                                                                               |
| Complete List of Authors:       | Giebel, Clarissa; University of Liverpool, Institute of Psychology, Health and Society<br>Pulford, Daniel; Lancashire Care NHS Foundation Trust<br>Cooper, Claudia; University College London<br>Lord, Kathryn; University of Bradford<br>Shenton, Justine; Sefton Older People's Forum<br>Cannon, Jacqueline; Lewy Body Society<br>Shaw, Lisa; University of Liverpool, Institute of Psychology, Health and Society<br>Tetlow, Hilary; SURF Liverpool<br>Limbert, Stan; NIHR ARC NWC<br>Callaghan, Steve; EQE Health<br>Whittington, Rosie; Me2U Care<br>Rogers, Carol; National Museums Liverpool<br>Komuravelli, Aravind; North West Boroughs Healthcare NHS Foundation Trust<br>Rajagopal, Manoj; Lancashire Care NHS Foundation Trust<br>Eley, Ruth; Liverpool DAA<br>Downs, Murna; University of Bradford, Bradford Dementia Group<br>Reilly, Siobhan; Lancaster University, Division of Health Research<br>Ward, Kym; The Brain Charity<br>Gaughan, Anna; TIDE<br>Butchard, Sarah; University of Liverpool, Institute of Psychology, Health and Society<br>Beresford, Jules; University of Bradford<br>Watkins, Caroline; University of Central Lancashire, Faculty of Health and Wellbeing<br>Bennett, Kate; University of Liverpool, Institute of Psychology, Health and Society<br>Gabbay, Mark |
| <b>Primary Subject Heading</b>: | Public health                                                                                                                                                                                                                                                                                                                                                                                                                                                                                                                                                                                                                                                                                                                                                                                                                                                                                                                                                                                                                                                                                                                                                                                                                                                                                             |
| Secondary Subject Heading:      | Mental health                                                                                                                                                                                                                                                                                                                                                                                                                                                                                                                                                                                                                                                                                                                                                                                                                                                                                                                                                                                                                                                                                                                                                                                                                                                                                             |
| Keywords:                       | Dementia < NEUROLOGY, COVID-19, MENTAL HEALTH, Old age psychiatry < PSYCHIATRY                                                                                                                                                                                                                                                                                                                                                                                                                                                                                                                                                                                                                                                                                                                                                                                                                                                                                                                                                                                                                                                                                                                                                                                                                            |



1  
2  
3  
4  
5  
6  
7  
8  
9  
10  
11  
12  
13  
14  
15  
16  
17  
18  
19  
20  
21  
22  
23  
24  
25  
26  
27  
28  
29  
30  
31  
32  
33  
34  
35  
36  
37  
38  
39  
40  
41  
42  
43  
44  
45  
46  
47  
48  
49  
50  
51  
52  
53  
54  
55  
56  
57  
58  
59  
60

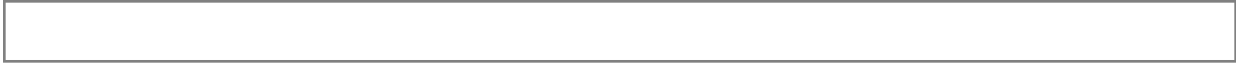

SCHOLARONE™  
Manuscripts



I, the Submitting Author has the right to grant and does grant on behalf of all authors of the Work (as defined in the below author licence), an exclusive licence and/or a non-exclusive licence for contributions from authors who are: i) UK Crown employees; ii) where BMJ has agreed a CC-BY licence shall apply, and/or iii) in accordance with the terms applicable for US Federal Government officers or employees acting as part of their official duties; on a worldwide, perpetual, irrevocable, royalty-free basis to BMJ Publishing Group Ltd ("BMJ") its licensees and where the relevant Journal is co-owned by BMJ to the co-owners of the Journal, to publish the Work in this journal and any other BMJ products and to exploit all rights, as set out in our [licence](#).

The Submitting Author accepts and understands that any supply made under these terms is made by BMJ to the Submitting Author unless you are acting as an employee on behalf of your employer or a postgraduate student of an affiliated institution which is paying any applicable article publishing charge ("APC") for Open Access articles. Where the Submitting Author wishes to make the Work available on an Open Access basis (and intends to pay the relevant APC), the terms of reuse of such Open Access shall be governed by a Creative Commons licence – details of these licences and which [Creative Commons](#) licence will apply to this Work are set out in our licence referred to above.

Other than as permitted in any relevant BMJ Author's Self Archiving Policies, I confirm this Work has not been accepted for publication elsewhere, is not being considered for publication elsewhere and does not duplicate material already published. I confirm all authors consent to publication of this Work and authorise the granting of this licence.

1  
2  
3  
4  
5  
6  
7  
8  
9  
10  
11  
12  
13  
14  
15

## COVID-19-related social support service closures and mental well-being in older adults and those affected by dementia: A UK longitudinal survey

16  
17  
18  
19  
20  
21  
22  
23  
24  
25  
26  
27  
28  
29  
30  
31  
32  
33  
34  
35  
36  
37  
38  
39  
40  
41  
42  
43  
44  
45  
46  
47  
48  
49  
50  
51  
52  
53  
54  
55  
56  
57  
58  
59  
60

**Clarissa Giebel<sup>1,2,\*</sup>, Daniel Pulford<sup>3</sup>, Claudia Cooper<sup>4</sup>, Kathryn Lord<sup>5</sup>, Justine Shenton<sup>6</sup>, Jacqueline Cannon<sup>7</sup>, Lisa Shaw<sup>8</sup>, Hilary Tetlow<sup>9</sup>, Stan Limbert<sup>2</sup>, Steve Callaghan<sup>10</sup>, Rosie Whittington<sup>11</sup>, Carol Rogers<sup>12</sup>, Aravind Komuravelli<sup>13</sup>, Manoj Rajagopal<sup>3</sup>, Ruth Eley<sup>14</sup>, Murna Downs<sup>5</sup>, Siobhan Reilly<sup>5</sup>, Kym Ward<sup>15</sup>, Anna Gaughan<sup>16</sup>, Sarah Butchard<sup>17</sup>, Jules Beresford<sup>5</sup>, Caroline Watkins<sup>2,18</sup>, Kate Bennett<sup>19</sup>, Mark Gabbay<sup>1,2</sup>**

1 Department of Primary Care & Mental Health, University of Liverpool, UK

2 NIHR ARC NWC, Liverpool, UK

3 Lancashire and South Cumbria NHS Trust, UK

4 Division of Psychiatry, UCL, UK

5 Centre for Applied Dementia Studies, University of Bradford, UK

6 Sefton Older People's Forum, Sefton, UK

7 Lewy Body Society, Wigan, UK

8 Department of Modern Languages and Cultures, University of Liverpool, UK

9 SURF Liverpool, UK

10 EQE Health, Liverpool, UK

11 Me2U Care, Liverpool, UK

12 National Museums Liverpool, UK

13 North West Boroughs NHS Trust, Warrington, UK

14 Liverpool Dementia Action Alliance, UK

15 The Brain Charity, Liverpool, UK

16 TIDE, Liverpool, UK

17 Mersey Care NHS Trust, Liverpool, UK

18 Department of Health Research, UCLAN, UK

19 School of Psychology, University of Liverpool, UK

\*Correspondence should be addressed to: Clarissa Giebel, Waterhouse Building, University of Liverpool, Liverpool, L69 3GL. Email: [Clarissa.giebel@liverpool.ac.uk](mailto:Clarissa.giebel@liverpool.ac.uk)

## Abstract

**Background:** The COVID-19 pandemic has had a major impact on delivery of social support services. This might be expected to particularly affect older adults and people living with dementia (PLWD), and to reduce their wellbeing.

**Aims:** To explore how social support service use by older adults, carers, and PLWD, and their mental wellbeing changed over the first three months since the pandemic outbreak.

**Methods:** Unpaid dementia carers, PLWD, and older adults took part in a longitudinal online or telephone survey collected in April-May 2020, and at two subsequent time points 6 and 12 weeks after baseline. Participants were asked about their social support service usage in a typical week prior to the pandemic (at baseline), and in the past week at each of the three time points. They also completed measures of levels of depression, anxiety and mental well-being.

**Results:** 377 participants had complete data at all three time points. Social support service usage dropped shortly after lockdown measures were imposed at timepoint 1 (T1), to then increase again by T3. The access to paid care was least affected by COVID-19. Cases of anxiety dropped significantly across the study period, whilst cases of depression rose. Well-being increased significantly for older adults and PLWD from T1 to T3.

**Conclusions:** Access to social support services has been significantly affected by the pandemic, which is starting to recover slowly. With mental well-being differently affected across groups, support needs to be put in place to maintain better well-being across those vulnerable groups during the ongoing pandemic.

### Strengths and limitations of this study

- Data on social support service usage and mental health were collected at three time points in the early stages of the pandemic
- 63% of participants completed all three survey time points
- The survey was co-produced with people affected by dementia
- The study was mostly completed by people from a White ethnic background, and lacks ethnic minority representation despite actively approaching community groups
- Some people with dementia completed the survey, who may have had difficulties in recalling the services they received pre-pandemic

For peer review only

## Introduction

In the UK, 11.9 million people are aged 65 and over [1], with over 850,000 living with dementia [2]. Social support services, including day care centres, support groups, paid home carers, and community activities, such as singing or arts groups, are important for maintaining a good quality of life for older people and people living with dementia (PLWD) [3-4]. In view of an ageing population and increasing numbers of PLWD, easily accessible services are crucial to support people socially, as well as with their care needs.

The COVID-19 pandemic has affected these social support services significantly. Social isolation as a result of social distancing, lockdowns, and shielding is a huge concern for older people across the globe since the beginning of the pandemic [5-6], with similar issues highlighted early for PLWD [7]. However, there is still a dearth of evidence on the mental well-being and access to care for those in need.

Specifically, in the UK, a nationwide three-month lockdown was imposed on the 23<sup>rd</sup> of March. Older people were over-represented in the group who were clinically extremely vulnerable, that is at greatest risk of severe illness from COVID-19, who were asked to shield by the government until early August. All adults aged 70+ were classified as being at least moderate risk of severe illness from COVID-19 [8]. During the most restrictive, earlier period of lockdown, people were advised to only go outside once a day for essential food shopping, pharmacy visits, or to exercise. Non-essential shops were closed, and only started reopening in July. With additional social distancing for the general population, and use of personal protective equipment (PPE) for the health and social care workforce in place, these measures significantly impact the social support services that PLWD, carers, and older adults could receive. Recent qualitative evidence has highlighted how PLWD and unpaid carers have faced a sudden crisis in terms of accessing social support services since the pandemic [9], and have faced difficult decisions whether to continue or discontinue paid carers entering the home of the PLWD, for fear of potential virus transmission [10]. Whilst these qualitative accounts provide rich information on the experiences of having accessed (or failed to access) social support services during the pandemic, there appears to be no empirical evidence to date quantifying those experiences and linking these with mental well-being.

The aim of this exploratory study was to explore the impacts of COVID-19 on social support service closures and longitudinal changes in the mental illness and well-being of older adults, PLWD, and unpaid carers.

## Methods

### Participants and recruitment

We recruited UK residents who were aged 18+. PLWD were eligible to take part if they had a diagnosis of dementia. Unpaid carers were eligible to take part if they were (current carers) or had been caring for a relative or friend with dementia (former carers). Older adults were eligible to take part if they were aged 65 years or older.

Participants were recruited via different social support services third sector organisations, such as peer support group organisations, carer networks, cultural dementia training programme organisations, and national dementia subtype specific organisations, and by contacting people on their email circulation lists, via newsletters and social media accounts. We also directly contacted people who were accessing regular services, such as support groups or older people fora, via telephone. This ensured that people without internet access were able to participate in this research. We also utilised *Join Dementia Research*, a UK-wide

1  
2  
3 national online register of PLWD, carers, older adults, and health volunteers who are  
4 interested in taking part in dementia and ageing research.

5 Ethical approval was obtained from the University of Liverpool prior to study begin [Ref:  
6 7626].  
7

### 8 9 **Data collection**

10 The study was completed at three time points (T1, T2, T3), 5 and 6 weeks apart, respectively.  
11 Participants could complete the survey either online or over the phone with a research team  
12 member who entered their details into the online survey on their behalf. Participants from T1  
13 (baseline) were followed-up with the same mental well-being questionnaires at T2 and T3 and  
14 were followed-up either by telephone or email, depending on how they completed T1 survey.  
15 T1 ran from 17<sup>th</sup> April to 15<sup>th</sup> May (+/- 3 days). T2 ran from 29<sup>th</sup> May to 26<sup>th</sup> June (+/- 3 days).  
16 T3 ran from 10<sup>th</sup> July to 7<sup>th</sup> August (+/- 3 days).  
17  
18

### 19 20 **Variables and tools**

21 At T1, participants were asked about their background characteristics (including age, gender,  
22 ethnicity, postcode, living situation, type of dementia (if applicable), and employment).  
23 Postcode data were collected to generate an Index of Multiple Deprivation (IMD) quintile. IMD  
24 provides a measure of neighbourhood deprivation, taking into account income, education,  
25 crime, and health, amongst others. Quintile 1 indicates least deprived neighbourhoods, with  
26 quintile 5 indicating the most deprived neighbourhoods.  
27

28 Service usage was measured by asking about pre-pandemic and current receipt of  
29 different social support services (including paid carers, support groups, befrienders, day care  
30 centres, respite, meal deliveries, transport, social activities, clinical mental health support, and  
31 clinical physical support) and equipment, such as hand rails or shower seats, as well as the  
32 weekly total hours of social support services. Pre-pandemic service usage was defined as use  
33 of social support services in a typical week before the pandemic.  
34

35 Participants were also asked to complete the Personalised Health Questionnaire 9  
36 (PHQ-9) [11] for levels of depression, the Generalised Anxiety Disorder 7 (GAD-7) [12] for  
37 levels of anxiety, and the Short Warwick-Edinburgh Mental Well-Being Scale [13]  
38 (SWEMWBS) for quality of life. Higher scores on the PHQ-9, GAD-7, and the SWEMWBS  
39 indicated higher levels of depression, anxiety, and quality of life, respectively. We categorised  
40 participants who scored of 10 or more on the PHQ-9 as 'depressed' and on the GAD-7 as  
41 'anxious', as based on previous extensive research, indicating that these cut offs indicate  
42 general anxiety disorder and depression, respectively [14]. At T2 and T3, participants were  
43 asked again about their current levels of social support service receipt, weekly hours of  
44 support, equipment, as well as the PHQ-9, GAD-7, and SWEMWBS.  
45  
46  
47  
48

### 49 **Data analysis**

50 Data were analysed using SPSS 25, and the significance level was set at  $p < 0.05$ . Participant  
51 demographic characteristics and social support service usage and mental well-being variables  
52 were analysed using frequency analysis. Chi-square tests were used to assess variations in  
53 the proportions of participants who were categorised as 'depressed' or 'anxious'. Repeated  
54 measures ANOVAs with Greenhouse Geisser posthoc correction were used to analyse  
55 differences between T1, T2, and T3 in GAD-7 total, PHQ-9 total, and SWEMWBS total scores.  
56 For this analysis, only participants with complete GAD-7, PHQ-9, and SWEMWBS were  
57 included ( $n=377$ ). Paired samples t-tests were employed to compare the means of GAD-7,  
58 PHQ-9, and SWEMWBS at T1 between those who completed all three time points ( $n=377$ )  
59  
60

1  
2  
3 and those who dropped out after T1 or T2 (n=192). Bivariate correlation analysis was  
4 employed to assess whether changes in weekly social support service usage from pre-  
5 pandemic to T1 were associated with changes in GAD-7, PHQ-9, and SWEMWBS between  
6 T1 and T3.  
7

### 8 **Public involvement**

9 Unpaid carers and a PLWD were involved as equal team members in all aspects of the study  
10 – from conceptualisation and design through to analysis and dissemination.  
11  
12

## 13 **Results**

### 14 **Survey completion**

15 Figure 1 outlines the participant flow and completion rates in further detail. 569 participants  
16 completed the survey at T1 (61 PLWD; 219 current carers; 66 former carers; 223 older adults).  
17 420 participants completed the survey at T2 (38 PLWD; 168 current carers; 45 former carers;  
18 169 older adults). 377 participants completed all three waves of the survey (37 PLWD; 147  
19 current carers; 42 former carers; 148 older adults).  
20  
21  
22

### 23 **Participant characteristics**

24 Table 1 shows the demographic characteristics of those who completed T1 and those that  
25 completed all three survey time points, by subgroup. For those who completed all three time  
26 points, carers and older adults were mostly female (59-82%), whilst the majority of PLWD  
27 were male (62%). The majority of participants were from a White ethnic background (95-99%)  
28 and lived with someone else (61-88%), with current carers having the highest proportion of  
29 living with someone else. The majority of participants across all four groups lived in less  
30 deprived neighbourhoods (Quintiles 1 and 2) (52-61%). Thirty-seven PLWD took part in all  
31 three time points; the most common diagnostic subtype was Alzheimer's disease.  
32  
33

34 *[Figure 1 and Table 1]*  
35

### 36 **Social support service and activities usage**

37 Participants had accessed a range of social support services pre-pandemic, including day  
38 care centres, support groups, meal deliveries, respite, and paid carers. Figure 2 (A) shows the  
39 proportion of participants of the total sample (n=377) who reported accessing paid carers,  
40 support groups, day care, befrienders, and social activities prior to the pandemic, and at T1,  
41 T2, and T3. These were the most commonly used types of social support services prior to the  
42 pandemic. Social support services usage had dropped since the pandemic outbreak. Pre-  
43 pandemic, 27% of participants accessed social activities in the community, which dropped to  
44 6% at T1, T2, and T3. Paid care saw the smallest change – with 17% having accessed paid  
45 carers pre-pandemic, dropping to 12% at T1 and increasing slightly again to 15% at T3. Day  
46 care saw the largest drop, with only 1-2 % receiving day care since the outbreak, compared  
47 to 15% previously.  
48  
49

50 Figure 2 (B) shows the proportion of participants by group who have received any form  
51 of social support services pre-pandemic and at all three survey time points. Pre-pandemic,  
52 90% of current carers had received social support of any form, with between 45% and 50% of  
53 former carers and older adults having received some support. This decreased at T1 for all  
54 groups to between 20% (older adults) to 55% (current carers) receiving some type of support.  
55 Through T2 and T3, an upward trend emerged with more participants gaining access to some  
56 services again, with levels for PLWD and former carers being higher at T3 than at pre-  
57 pandemic levels.  
58  
59

60 *[Figure 2]*



### Mental well-being

Figure 3 shows the proportion of participants across the total sample (n=377) who were categorised and identified as anxious and depressed across all three time points. For anxiety, we noted a downward trend in number of cases from T1 (16.5%) to T3 (14.1%). The proportion of participants with anxiety was significantly lower at T2 ( $\chi^2=186.399$ ,  $p<0.001$ ) and T3 ( $\chi^2=136.562$ ,  $p<0.001$ ) compared to T1. For depression, we noted an upward trend in cases, as indicated based on their cut off on the PHQ-9, from T1 (14.4%) to T3 (17.5%). The proportion of participants with depression was significantly higher at T2 ( $\chi^2=176.248$ ,  $p<0.001$ ) and T3 ( $\chi^2=158.031$ ,  $p<0.001$ ) compared to T1.

Figure 4 shows the median of the GAD-7, PHQ-9, and SWEMWBS total scores by group over time for those who completed all three survey time points. Based on the median scores, levels of anxiety and depression appear to decrease from T1 to T3, whilst quality of life increases from T1 to T3.

Paired samples t-test showed that there were no significant differences in means of GAD-7 ( $p=.468$ ), PHQ-9 ( $p=.183$ ), and SWEMWBS ( $p=.332$ ) at T1 between those who completed all three survey time points and those who dropped out after T1 or T2.

For anxiety, repeated-measures ANOVAs with Greenhouse-Geisser posthoc correction showed that GAD-7 total scores did not vary significantly from T1 to T3 for PLWD [ $F(1.856, 64.962)=1.429$ ,  $p=0.247$ ] or among current carers [ $F(1.898, 277.063)=1.938$ ,  $p=0.148$ ], former carers [ $F(1.801, 68.419)=.139$ ,  $p=.139$ ], or older adults [ $F(1.924, 286.727)=2.688$ ,  $p=.0072$ ], based on those participants who completed in all three survey time points.

For depression, repeated-measures ANOVAs showed that PHQ-9 total scores did not significantly vary from T1 to T3 for PLWD [ $F(1.896, 66.370)=1.461$ ,  $p=0.240$ ], current carers [ $F(1.900, 277.453)=.639$ ,  $p=0.521$ ], former carers [ $F(1.677, 68.419)=.024$ ,  $p=0.960$ ], or older adults [ $F(1.889, 281.414)=.857$ ,  $p=0.420$ ].

For well-being, repeated-measures ANOVAs showed that SWEMWBS total scores significantly increased from T1 to T3 for PLWD [ $F(1.726, 60.423)=5.412$ ,  $p<0.05$  [Mean(SD) T1-T3= 22.1(6.4); 24.3(5.6); 24.4(5.6)]] and older adults [ $F(1.804, 268.807)=3.632$ ,  $p<0.05$  [Mean(SD) T1-T3= 27.5(5.1); 28.0(5.1); 28.3(4.9)]]. However there were no significant changes among current [ $F(1.982, 289.325)=2.185$ ,  $p=0.115$ ] or former carers [ $F(1.728, 63.725)=.268$ ,  $p=0.733$ ].

### [Figure 3 and 4]

### Social support and mental health

Bivariate correlation analyses showed no significant associations between variations in social support service hours between pre-pandemic and at T1 and changes in SWEMWBS ( $p=.332$ ), GAD-7 ( $p=.310$ ), and PHQ-9 ( $p=.351$ ) between T1 and T3 for those who completed all three survey time points.

### Discussion

This is one of the first studies to show that social support service usage in dementia and ageing reduced significantly compared to pre-pandemic levels, whilst slowly rising in the months post-nationwide lockdown. In addition, we also show that cases of anxiety reduced whilst cases of depression increased in the months since lockdown, with quality of life significantly increasing for PLWD and older adults only.

Social support service usage for PLWD, unpaid carers, and older adults has seen a significant decrease since the COVID-19 pandemic, leaving many people suddenly without vital support – ranging from day care centres to respite to support groups. In the months following the nationwide lockdown, usage has gradually increased again but varied among

1  
2  
3 providers and type of support. With public health restrictions still remaining in place however  
4 during that period, including social distancing, shielding and thus inability to meet members of  
5 different households, such support is most likely to be implemented via digital technologies.  
6 Considering that in our sample 94% of participants completed the survey online rather than  
7 the telephone option, nearly all participants had access to the internet. However, many older  
8 adults and PLWD are less likely to be digitally literate [15], making it difficult for all people to  
9 access services equally. This has already been an issue pre-COVID-19 [16], suggesting that  
10 the pandemic has further exacerbated potential inequalities in access and thus further isolated  
11 people who would benefit from social support the most.  
12

13 One type of support which has been affected the least by the pandemic has been paid  
14 home care. Receiving paid home care enables PLWD and older adults to stay at home  
15 independently for longer – as people wish to avoid entering a care home and stay in their  
16 familiar environment [17]. Whilst there was a reduction in paid home care usage compared to  
17 pre-pandemic levels, overall paid home carers were utilised the most. A qualitative exploration  
18 into decision-making for whether or not to continue paid home care during the pandemic has  
19 shown that many unpaid carers were afraid of having paid carers enter the home (often with  
20 inadequate PPE) for risk of potential virus transmission [10]. Other unpaid carers however felt  
21 unable to cope without the support, or indeed accepted the potential risks, and continued paid  
22 home care. There is also a notable difference between social care provision (which is paid  
23 home care) and third sector care provision (which involves support groups and social activities  
24 for example). The third sector relies on volunteers providing services, and has also suffered  
25 during the pandemic, whereas the social care sector is financially supported by the  
26 government. Therefore, the ability to receive home care might not have been affected to the  
27 same extent as accessing support groups for instance. Another potential reason for variations  
28 in usage between activity types is that home care involves someone from the outside entering  
29 someone's home. In contrast, day care centres, respite care, and social activities involve older  
30 adults and PLWD going outside to larger social gatherings. Due to public health restrictions,  
31 these have been temporarily rendered largely, if not completely, impossible to take place in  
32 their original face-to-face formats. As numbers of infections rise again, these restrictions are  
33 being strengthened and re-imposed with large fines possible for those transgressing them.  
34

35  
36  
37 Anxiety, depression, and well-being changed over the course of the study period. Over  
38 12 weeks, cases of anxiety across the total sample dropped, whilst cases of depression  
39 increased significantly. However, when exploring levels of anxiety and depression within  
40 groups, no significant changes were noted, which is likely to have been due to small and varied  
41 sample sizes for each subgroup. This may be because people who were very depressed or  
42 anxious might not have continued the follow-up surveys. It is also possible though that  
43 participants felt more connected over time, particularly considering again that the majority of  
44 participants completed the survey online and thus were able to participate in remote services,  
45 where these existed. Recent evidence from Spain showed how older adults were less likely to  
46 suffer from psychological distress as a result of the pandemic than people aged below 60 [18].  
47 Nevertheless, overall the pandemic is having a heightened impact on the mental health of the  
48 general population [19-20]. Engaging in social activities can be one avenue to help maintain  
49 good mental health [21]. Considering that reductions in social engagement both before and  
50 after a dementia diagnosis are common [22], enabling continued engagement throughout the  
51 pandemic is important to support PLWD, carers, and older adults adequately. This is  
52 corroborated by evidence from the baseline survey showing that reductions in social support  
53 usage were linked to mental well-being [23]. It is possible that for this study, merging groups  
54 of older adults, PLWD, and carers resulted in no significant associations, as each group was  
55 differently affected, as indicated by looking at changes of mental well-being for each group  
56 across the 12 weeks.  
57  
58  
59  
60

1  
2  
3  
4  
5  
6  
7  
8  
9  
10  
11  
12  
13  
14  
15  
16  
17  
18  
19  
20  
21  
22  
23  
24  
25  
26  
27  
28  
29  
30  
31  
32  
33  
34  
35  
36  
37  
38  
39  
40  
41  
42  
43  
44  
45  
46  
47  
48  
49  
50  
51  
52  
53  
54  
55  
56  
57  
58  
59  
60

There were some limitations to our exploratory study. Whilst benefitting from a large sample size and good retention rate over a relatively short time period of 12 weeks, the majority of participants had internet access and were thus also able to join in remote social support. Although we actively approached older adults, PLWD, and carers via phone through recruiting organisations, only some people took part over the phone. It is likely however that those people without internet access have been even more isolated through the pandemic, with potentially severe mental health needs, which we have only captured a snapshot of. This also links to the fact that there are likely to be longer-term effects on mental well-being, with our survey only providing a snap shot of the first few months since the start of the pandemic. Equally, our survey did not include pre-pandemic levels of mental well-being (anxiety, depression, and quality of life), which would have provided additional insight into changes in mental well-being. However, due to the unforeseen circumstance of the pandemic, it was not feasible to collect these data. We only enquired about weekly hours of total social support usage, and not for each specific type of activity. Some participants might have accessed, for example, paid home care, but only for two hours as opposed to others who might have received 40 hours a week. We are thus unable to state in detail how the pandemic has affected the level of each different type of support, but instead we provide a more general overview of activities and general service usage variations since the nationwide lockdown, which to existing knowledge has not been captured elsewhere.

## Conclusions

The pandemic is having a sudden and severe long-term impact on social support service usage for older adults and people affected by dementia, which sees somewhat of a limited increase in usage over the first few months since nationwide lockdown. Whilst it appears that some services have started providing remote support, not everyone will be able to access these, leaving many people without much needed support. Future research needs to assess how older adults and people affected by dementia are accessing social support services in the time of COVID-19, with clearer support for people to access any format of services – either face-to-face or remotely. Considering that the pandemic is going to continue for the foreseeable future, the mental health of older adults and those affected by dementia needs to be closely monitored, particularly when more stringent public health measures are put in place again.

**Conflicts of interest**

None.

**Acknowledgements**

This study would not have been possible without our participants, thank you very much. We also wish to thank Join Dementia Research for helping us recruit to our study.

**Funding**

This research is supported by a grant awarded to the authors by the University of Liverpool COVID-19 Strategic Research Fund in 2020. This is also independent research funded by the National Institute for Health Research Applied Research Collaboration North West Coast (ARC NWC). The views expressed in this publication are those of the author(s) and not necessarily those of the National Institute for Health Research or the Department of Health and Social Care. The University of Bradford QR Research Fund also supported part of this study. There are no grant numbers.

**Data availability statement**

Data may be obtained from a third party and are not publicly available.

**Author contributions**

CG managed data collection, conducted analysis, and wrote the manuscript. JC, JS, and DP collected data over the phone. DP managed the data. All authors (CG, DP, CC, KL, JS, JC, LS, HT, SL, SC, RW, CR, AK, MR, RE, MD, SR, KW, AG, SB, JB, CW, KB, MG) contributed to designing the survey, interpreting the findings, and reading drafts of the manuscript. All authors approved the final manuscript. Emma Riley helped with recruitment by emailing eligible participants via the House of Memories networks and we wish to thank her for her support with this.

## Figure Captions

### Figure 1. Flow of participation in longitudinal survey

**NOTE.** The top boxes indicate how many people completed each survey time point. After having removed (1) duplicates (people who completed the survey twice), (2) missing cases (where participants had not completed the PHQ-9, GAD-7, and the SWEMWBS or had missing ID codes at T2 and T3), and (3) losses to follow-up (those that had either completed T1 or T1 and T2 only), and (4) incomplete data at T1 yet data at T2 or T3, 377 cases remained in total. Grey boxes indicate the breakdown by subgroup.

<sup>1</sup> Follow-up completion by subgroup by percentage at T2 and T3 compared to T1: PLWD 69%(T2), 67%(T3); Current Carers 86%(T2), 75%(T3); Former carers 64%(T2), 60%(T3); Older adults 79%(T2), 69%(T3).

### Figure 2. Social support service usage pre-pandemic and at 3 survey time points

**Note.** (A) Service usage for the total sample (N=377) in proportion of participants at four different time points for some of the most frequently used support services. (B) Proportion of participants within each group at four different timepoints (pre-pandemic, T1, T2, T3) having received any form of social support.

### Figure 3. Proportion of the total sample who scored above the cut offs for anxiety and depression at three time points

**NOTE.** T = Time point

The graph shows the proportion of participants from the total sample who completed all three surveys (n=377) and scored above the cut off on the GAD-7 and PHQ-9 for anxiety and depression, respectively.

### Figure 4. Variations in anxiety, depression, and quality of life total scores at 3 time points

**NOTE.** Figures show the median total score at each time point (T1, T2, T3) for each subgroup – for anxiety (GAD-7), depression (PHQ-9), and quality of life (SWEMWBS).

## References

- 1  
2  
3 [1] Office for National Statistics (ONS). *Living longer: is age 70 the new age 65?* London, England 2019: ONS.
- 4  
5  
6 [2] Alzheimer's Society. *Dementia UK: An Update*. London, England: Alzheimer's Society  
7 2014.
- 8  
9 [3] Skingley A, Martin A, Clift S. The contribution of community singing groups to the well-  
10 being of older people: participant perspectives from the United Kingdom. *Journal of*  
11 *Applied Gerontology* 2016;35(12):1302-1324.
- 12  
13 [4] Tretteteig S, Vatne S, Mork Rokstad AM. The influence of day care centres designed  
14 for people with dementia on family caregivers – a qualitative study. *BMC Geriatrics*  
15 2017;17(5).
- 16  
17 [5] Armitage R, Nellums LB. COVID-19 and the consequences of isolating elderly.  
18 *LANCET Public Health* 2020; 5(5):doi: 10.1016/S2468-2667(20)30061-X
- 19  
20 [6] Berg-Weger M, Morley JE. Loneliness and social isolation in older adults during the  
21 COVID-19 pandemic: implications for gerontological social work. *Journal of Nutrition,*  
22 *Health & Ageing* 2020;24(5):456-458.
- 23  
24 [7] Brown EE, Kumr S, Rajji TK, et al. Anticipating and mitigating the impact of the COVID-  
25 19 pandemic on Alzheimer's disease and related dementias. *American Journal of*  
26 *Geriatric Psychiatry* 2020;28(7):712-721.
- 27  
28 [8] Public Health England (PHE). *Guidance on shielding and protecting people who are*  
29 *clinically extremely vulnerable from COVID-19*. London, England 2020: PHE. Last  
30 accessed 22<sup>nd</sup> September 2020: [https://www.gov.uk/government/publications/guidance-](https://www.gov.uk/government/publications/guidance-on-shielding-and-protecting-extremely-vulnerable-persons-from-covid-19/guidance-on-shielding-and-protecting-extremely-vulnerable-persons-from-covid-19#definition)  
31 [on-shielding-and-protecting-extremely-vulnerable-persons-from-covid-19/guidance-on-](https://www.gov.uk/government/publications/guidance-on-shielding-and-protecting-extremely-vulnerable-persons-from-covid-19/guidance-on-shielding-and-protecting-extremely-vulnerable-persons-from-covid-19#definition)  
32 [shielding-and-protecting-extremely-vulnerable-persons-from-covid-19#definition](https://www.gov.uk/government/publications/guidance-on-shielding-and-protecting-extremely-vulnerable-persons-from-covid-19/guidance-on-shielding-and-protecting-extremely-vulnerable-persons-from-covid-19#definition)
- 33  
34 [9] Giebel C, Cannon J, Hanna K, et al. Impact of Covid-19 related social support service  
35 closures on people with dementia and unpaid carers: A qualitative study. *Aging &*  
36 *Mental Health* 2020a; doi: 10.1080/13607863.2020.1822292
- 37  
38 [10] Giebel C, Hanna K, Cannon J, et al. Decision-making for receiving paid home care for  
39 dementia in the time of COVID-19: A qualitative study. *BMC Geriatrics* 2020b; doi:  
40 10.1186/s12877-020-01719-0
- 41  
42  
43 [11] Kroenke K, Spitzer RL, Williams JB. The PHQ-9: validity of a brief depression severity  
44 measure. *Journal of General Internal Medicine* 2001;16(9):606-613.
- 45  
46 [12] Spitzer RL, Kroenke K, Williams JB, Loewe B. A brief measure for assessing  
47 generalized anxiety disorder: the GAD-7. *Archives of Internal Medicine*  
48 2006;166(10):1092-1097.
- 49  
50 [13] Haver A, Akerjordet K, Caputi P, et al. Measuring mental well-being: A validation of the  
51 Short Warwick-Edinburgh Mental Well-Being Scale in Norwegian and Swedish.  
52 *Scandinavian Journal of Public Health* 2015;43(7):721-727.
- 53  
54 [14] Smith, B.W., Epstein, E.E., Oritz, J.A., Christopher, P.K., & Tooley, E.M. (2013). The  
55 Foundations of Resilience: What are the critical resources for bouncing back from  
56 stress? In Prince-Embury, S. & Saklofske, D.H. (Eds.), *Resilience in children,*  
57 *adolescents, and adults: Translating research into practice*, The Springer series on  
58 human exceptionality (pp. 167-187). New York, NY: Springer.
- 59  
60

- 1  
2  
3 [15] Hill R, Betts LR, Gardner SE. Older adults' experiences and perceptions of digital  
4 technology: (Dis)empowerment, wellbeing, and inclusion. *Computers in Human*  
5 *Behavior* 2015;48: 415-423.  
6  
7 [16] Stephan A, Bieber A, Hopper L, et al. Barriers and facilitators to the access to and use  
8 of formal dementia care: findings of a focus group study with people with dementia,  
9 informal carers and health and social care professionals in eight European countries.  
10 *BMC Health Services Research* 2018; 131: doi: 10.1186/s12877-018-0816-1  
11  
12 [17] Rapaport P, Burton A, Leverton M, et al. "I just keep thinking that I don't want to rely  
13 on people." A qualitative study of how people living with dementia achieve and maintain  
14 independence at home: stakeholder perspectives *BMC Geriatrics* 2020; doi:  
15 10.1186/s12877-019-1406-6  
16  
17 [18] Garcia-Portilla P, de la Fuente Tomas L, Bobes-Bascaran T, et al. Are older adults  
18 also at higher psychological risk from COVID-19? *Aging & Mental Health* 2020; doi:  
19 10.1080/13607863.2020.1805723  
20  
21 [19] Fancourt D, Steptoe A, Bu F. Trajectories of depression and anxiety during enforced  
22 isolation due to COVID-10: longitudinal analyses of 59,318 adults in the UK with and  
23 without diagnosed mental illness. *medRxiv preprint* 2020; doi:  
24 10.1101/2020.06.03.20120923  
25  
26 [20] Job E, Steptoe A, Fancourt D. Abuse, self-harm and suicidal ideation in the UK during  
27 the COVID-19 pandemic. *British Journal of Psychiatry* 2020; doi:  
28 10.1192/bjp.2020.130  
29  
30 [21] Holtfreter K, Reisig MD, Turanovic JJ. Depression and infrequent participation in social  
31 activities among older adults: the moderating role of high-quality familial ties. *Aging &*  
32 *Mental Health* 2017;21(4): 10.1080/13607863.2015.1099036  
33  
34 [22] Hackett RA, Steptoe A, Cadar D, Fancourt D. Social engagement before and after  
35 dementia diagnosis in the English Longitudinal Study of Ageing. *PLOS One* 2019; doi:  
36 10.1371/journal.pone.0220195  
37  
38 [23] Giebel C, Lord K, Cooper C, et al. A UK survey of COVID-19 related social support  
39 service closures and the effects on older people, people with dementia, and carers.  
40 *International Journal of Geriatric Psychiatry* 2020c; doi: 10.1002/gps.5434  
41  
42  
43  
44  
45  
46  
47  
48  
49  
50  
51  
52  
53  
54  
55  
56  
57  
58  
59  
60

Table 1. Participant characteristics of those completing T1 survey and those completing all three survey time points

|                           | T1 (n=569)          |                        |                      |                      | T1, 2 and 3 (n=377) |                        |                      |                      |
|---------------------------|---------------------|------------------------|----------------------|----------------------|---------------------|------------------------|----------------------|----------------------|
|                           | PLWD (n=61)         | Current carers (n=219) | Former carers (n=66) | Older adults (n=223) | PLWD (n=37)         | Current carers (n=149) | Former carers (n=39) | Older adults (n=152) |
| <b>N(%)</b>               |                     |                        |                      |                      |                     |                        |                      |                      |
| <b>Gender</b>             |                     |                        |                      |                      |                     |                        |                      |                      |
| <b>Female</b>             | 27 (44.3)           | 168 (77.1)             | 55 (83.3)            | 137 (61.7)           | 14 (37.8)           | 118 (79.7)             | 32 (82.1)            | 90 (59.2)            |
| <b>Male</b>               | 34 (55.7)           | 50 (22.9)              | 11 (16.7)            | 85 (38.3)            | 23 (62.2)           | 30 (20.3)              | 7 (17.9)             | 62 (40.8)            |
| <b>Ethnicity</b>          |                     |                        |                      |                      |                     |                        |                      |                      |
| <b>White</b>              | 58 (96.7)           | 211 (96.3)             | 65 (98.5)            | 216 (98.2)           | 35 (94.6)           | 143 (96.0)             | 38 (97.4)            | 148 (98.7)           |
| <b>Other</b>              | 2 (3.4)             | 8 (3.7)                | 1 (1.5)              | 4 (1.9)              | 2 (5.4)             | 6 (4.0)                | 1 (2.6)              | 2 (1.3)              |
| <b>Living situation</b>   |                     |                        |                      |                      |                     |                        |                      |                      |
| <b>Alone</b>              | 13 (21.3)           | 33 (15.1)              | 17 (26.2)            | 79 (35.6)            | 8 (21.6)            | 18 (12.2)              | 11 (28.9)            | 59 (39.1)            |
| <b>With someone</b>       | 48 (78.7)           | 185 (84.9)             | 48 (73.8)            | 143 (64.4)           | 29 (78.4)           | 130 (87.8)             | 27 (71.1)            | 92 (60.9)            |
| <b>IMD Quintile</b>       |                     |                        |                      |                      |                     |                        |                      |                      |
| <b>1</b>                  | 12 (23.1)           | 54 (32.1)              | 10 (19.2)            | 61 (33.5)            | 5 (16.1)            | 35 (31.0)              | 6 (19.4)             | 39 (31.7)            |
| <b>2</b>                  | 16 (30.8)           | 50 (29.8)              | 20 (38.5)            | 44 (24.2)            | 11 (35.5)           | 34 (30.1)              | 11 (35.5)            | 29 (23.6)            |
| <b>3</b>                  | 10 (19.2)           | 32 (19.0)              | 14 (26.9)            | 37 (20.3)            | 6 (19.4)            | 20 (17.7)              | 9 (29.0)             | 26 (21.1)            |
| <b>4</b>                  | 10 (19.2)           | 14 (8.3)               | 5 (9.6)              | 26 (14.3)            | 5 (16.1)            | 11 (9.7)               | 4 (12.9)             | 18 (14.6)            |
| <b>5</b>                  | 4 (7.7)             | 18 (10.7)              | 3 (5.8)              | 14 (7.7)             | 4 (12.9)            | 13 (11.5)              | 1 (3.2)              | 11 (8.9)             |
| <b>Type of dementia</b>   |                     |                        |                      |                      |                     |                        |                      |                      |
| <b>Alzheimer's</b>        | 20 (32.8)           | 100 (46.5)             | 6 (23.1)             |                      | 14 (37.8)           | 75 (50.7)              | 2 (20.0)             |                      |
| <b>Mixed</b>              | 13 (21.3)           | 49 (22.8)              | 7 (26.9)             |                      | 6 (16.2)            | 34 (23.0)              | 4 (40.0)             |                      |
| <b>Vascular</b>           | 11 (18.0)           | 27 (12.6)              | 4 (15.4)             |                      | 8 (21.6)            | 18 (12.2)              | 3 (30.0)             |                      |
| <b>Other</b>              | 17 (27.9)           | 39 (18.1)              | 9 (34.5)             |                      | 9 (24.3)            | 21 (14.1)              | 1 (10.0)             |                      |
| <b>Mean (SD), [Range]</b> |                     |                        |                      |                      |                     |                        |                      |                      |
| <b>Age</b>                | 70 (+/-10), [45-88] | 61 (+/-13), [23-89]    | 64 (+/-14), [22-95]  | 72 (+/-6), [65-90]   | 72 (+/-10), [50-88] | 62 (+/-13), [23-89]    | 65 (+/-13), [22-95]  | 73 (+/-6), [65-90]   |
| <b>Years of education</b> | 15 (+/-4), [4-25]   | 16 (+/-4), [6-28]      | 17 (+/-4), [10-29]   | 17 (+/-4), [7-25]    | 13 (+/-4), [4-20]   | 16 (+/-4), [6-28]      | 16 (+/-4), [10-29]   | 16 (+/-4), [7-24]    |

**NOTE.** 569 participants completed the survey at T1, with duplicates and missing cases removed. 377 participants had completed all three survey time points, with duplicates and missing cases removed.

PLWD – People living with dementia



1  
2  
3  
4  
5  
6  
7  
8  
9  
10  
11  
12  
13  
14  
15  
16  
17  
18  
19  
20  
21  
22  
23  
24  
25  
26  
27  
28  
29  
30  
31  
32  
33  
34  
35  
36  
37  
38  
39  
40  
41  
42  
43  
44  
45  
46  
47  
48  
49  
50  
51  
52  
53  
54  
55  
56  
57  
58  
59  
60

For peer review only

Figure 1. Flow of participation in longitudinal survey

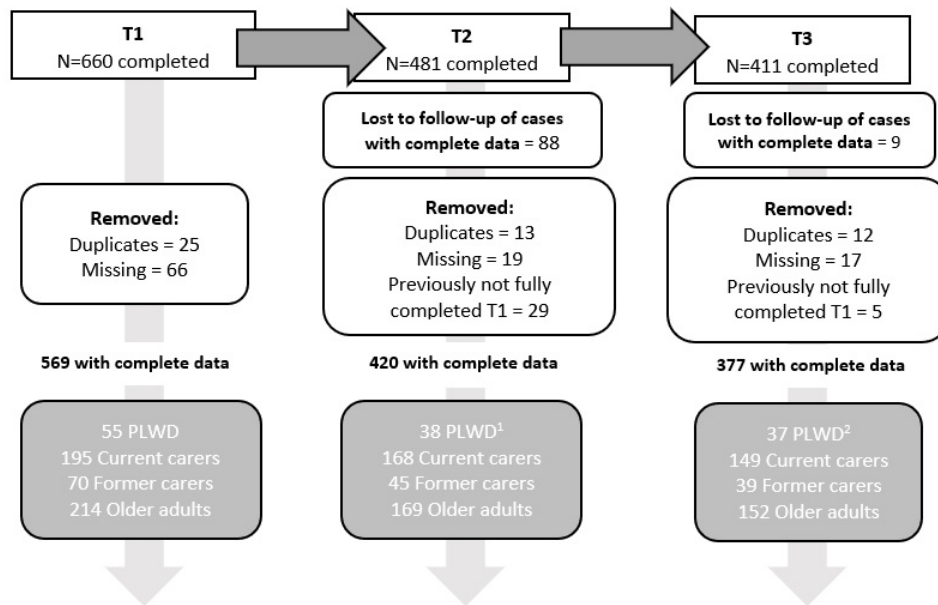

147x102mm (144 x 144 DPI)

1  
2  
3  
4  
5  
6  
7  
8  
9  
10  
11  
12  
13  
14  
15  
16  
17  
18  
19  
20  
21  
22  
23  
24  
25  
26  
27  
28  
29  
30  
31  
32  
33  
34  
35  
36  
37  
38  
39  
40  
41  
42  
43  
44  
45  
46  
47  
48  
49  
50  
51  
52  
53  
54  
55  
56  
57  
58  
59  
60

Figure 2. Social support service usage pre-pandemic and at 3 survey time points



109x112mm (144 x 144 DPI)

Figure 3. Proportion of the total sample who scored above the cut offs for anxiety and depression at three time points



100x54mm (144 x 144 DPI)

**Figure 4. Variations in anxiety, depression, and quality of life total scores at 3 time points**

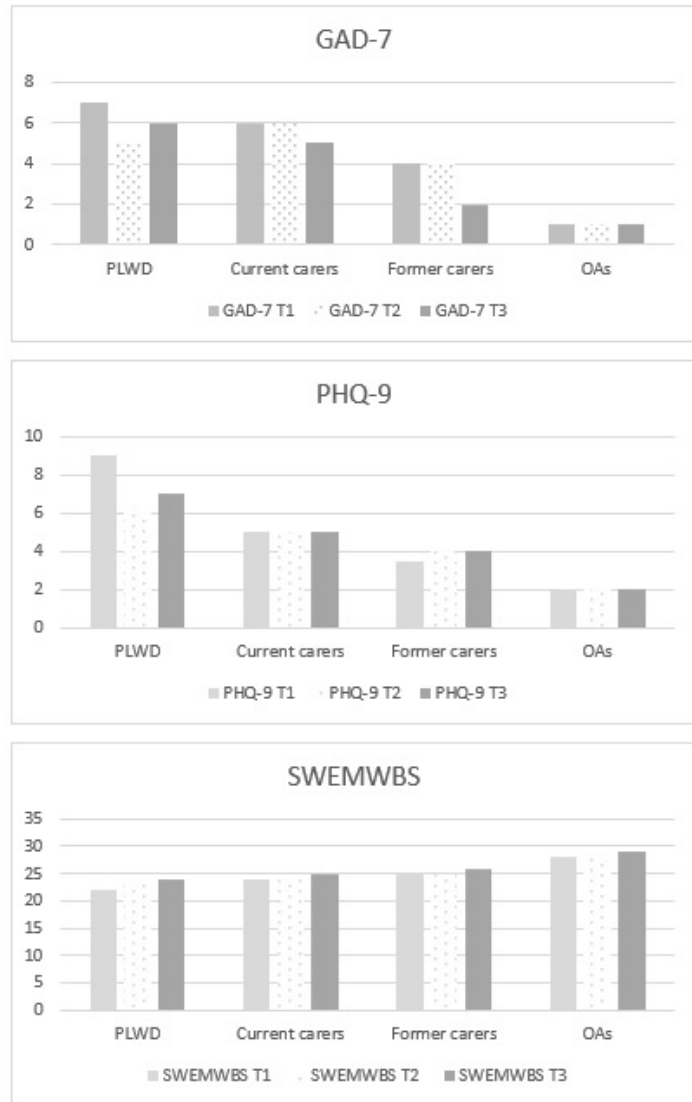

101x121mm (144 x 144 DPI)

## STROBE Statement—checklist of items that should be included in reports of observational studies

|                           | Item No | Page  | Recommendation                                                                                                                                                                                                                                                                                                                                                                                                                                                         |
|---------------------------|---------|-------|------------------------------------------------------------------------------------------------------------------------------------------------------------------------------------------------------------------------------------------------------------------------------------------------------------------------------------------------------------------------------------------------------------------------------------------------------------------------|
| <b>Title and abstract</b> | 1       | 1 & 2 | (a) Indicate the study's design with a commonly used term in the title or the abstract                                                                                                                                                                                                                                                                                                                                                                                 |
|                           |         | 1 & 2 | (b) Provide in the abstract an informative and balanced summary of what was done and what was found                                                                                                                                                                                                                                                                                                                                                                    |
| <b>Introduction</b>       |         |       |                                                                                                                                                                                                                                                                                                                                                                                                                                                                        |
| Background/rationale      | 2       | 4     | Explain the scientific background and rationale for the investigation being reported                                                                                                                                                                                                                                                                                                                                                                                   |
| Objectives                | 3       | 4     | State specific objectives, including any prespecified hypotheses                                                                                                                                                                                                                                                                                                                                                                                                       |
| <b>Methods</b>            |         |       |                                                                                                                                                                                                                                                                                                                                                                                                                                                                        |
| Study design              | 4       | 4-5   | Present key elements of study design early in the paper                                                                                                                                                                                                                                                                                                                                                                                                                |
| Setting                   | 5       | 4-5   | Describe the setting, locations, and relevant dates, including periods of recruitment, exposure, follow-up, and data collection                                                                                                                                                                                                                                                                                                                                        |
| Participants              | 6       | 4-5   | (a) <i>Cohort study</i> —Give the eligibility criteria, and the sources and methods of selection of participants. Describe methods of follow-up<br><i>Case-control study</i> —Give the eligibility criteria, and the sources and methods of case ascertainment and control selection. Give the rationale for the choice of cases and controls<br><i>Cross-sectional study</i> —Give the eligibility criteria, and the sources and methods of selection of participants |
|                           |         | 4-5   | (b) <i>Cohort study</i> —For matched studies, give matching criteria and number of exposed and unexposed<br><i>Case-control study</i> —For matched studies, give matching criteria and the number of controls per case                                                                                                                                                                                                                                                 |
| Variables                 | 7       | 5     | Clearly define all outcomes, exposures, predictors, potential confounders, and effect modifiers. Give diagnostic criteria, if applicable                                                                                                                                                                                                                                                                                                                               |
| Data sources/measurement  | 8*      | 5     | For each variable of interest, give sources of data and details of methods of assessment (measurement). Describe comparability of assessment methods if there is more than one group                                                                                                                                                                                                                                                                                   |
| Bias                      | 9       | n/a   | Describe any efforts to address potential sources of bias                                                                                                                                                                                                                                                                                                                                                                                                              |
| Study size                | 10      | 6     | Explain how the study size was arrived at                                                                                                                                                                                                                                                                                                                                                                                                                              |
| Quantitative variables    | 11      | 5     | Explain how quantitative variables were handled in the analyses. If applicable, describe which groupings were chosen and why                                                                                                                                                                                                                                                                                                                                           |
| Statistical methods       | 12      | 5     | (a) Describe all statistical methods, including those used to control for confounding                                                                                                                                                                                                                                                                                                                                                                                  |
|                           |         | 5     | (b) Describe any methods used to examine subgroups and interactions                                                                                                                                                                                                                                                                                                                                                                                                    |
|                           |         | 5     | (c) Explain how missing data were addressed                                                                                                                                                                                                                                                                                                                                                                                                                            |
|                           |         | 5     | (d) <i>Cohort study</i> —If applicable, explain how loss to follow-up was addressed<br><i>Case-control study</i> —If applicable, explain how matching of cases and controls was addressed<br><i>Cross-sectional study</i> —If applicable, describe analytical methods taking account of sampling strategy                                                                                                                                                              |
|                           |         | 5     | (e) Describe any sensitivity analyses                                                                                                                                                                                                                                                                                                                                                                                                                                  |

1  
2  
3  
4  
5  
6  
7  
8  
9  
10  
11  
12  
13  
14  
15  
16  
17  
18  
19  
20  
21  
22  
23  
24  
25  
26  
27  
28  
29  
30  
31  
32  
33  
34  
35  
36  
37  
38  
39  
40  
41  
42  
43  
44  
45  
46  
47  
48  
49  
50  
51  
52  
53  
54  
55  
56  
57  
58  
59  
60

Continued on next page

For peer review only

| <b>Results</b>           |     |                                                                                                                                                                                                                                                                                                                                                                                                               | <b>Page</b>       |
|--------------------------|-----|---------------------------------------------------------------------------------------------------------------------------------------------------------------------------------------------------------------------------------------------------------------------------------------------------------------------------------------------------------------------------------------------------------------|-------------------|
| Participants             | 13* | (a) Report numbers of individuals at each stage of study—eg numbers potentially eligible, examined for eligibility, confirmed eligible, included in the study, completing follow-up, and analysed<br>(b) Give reasons for non-participation at each stage<br>(c) Consider use of a flow diagram                                                                                                               | 6<br><br>Figure 1 |
| Descriptive data         | 14* | (a) Give characteristics of study participants (eg demographic, clinical, social) and information on exposures and potential confounders<br>(b) Indicate number of participants with missing data for each variable of interest<br>(c) <i>Cohort study</i> —Summarise follow-up time (eg, average and total amount)                                                                                           | 6<br>6            |
| Outcome data             | 15* | <i>Cohort study</i> —Report numbers of outcome events or summary measures over time<br><i>Case-control study</i> —Report numbers in each exposure category, or summary measures of exposure<br><i>Cross-sectional study</i> —Report numbers of outcome events or summary measures                                                                                                                             | 6                 |
| Main results             | 16  | (a) Give unadjusted estimates and, if applicable, confounder-adjusted estimates and their precision (eg, 95% confidence interval). Make clear which confounders were adjusted for and why they were included<br>(b) Report category boundaries when continuous variables were categorized<br>(c) If relevant, consider translating estimates of relative risk into absolute risk for a meaningful time period | 6-7<br>6-7        |
| Other analyses           | 17  | Report other analyses done—eg analyses of subgroups and interactions, and sensitivity analyses                                                                                                                                                                                                                                                                                                                | 6-7               |
| <b>Discussion</b>        |     |                                                                                                                                                                                                                                                                                                                                                                                                               |                   |
| Key results              | 18  | Summarise key results with reference to study objectives                                                                                                                                                                                                                                                                                                                                                      | 7                 |
| Limitations              | 19  | Discuss limitations of the study, taking into account sources of potential bias or imprecision. Discuss both direction and magnitude of any potential bias                                                                                                                                                                                                                                                    | 8                 |
| Interpretation           | 20  | Give a cautious overall interpretation of results considering objectives, limitations, multiplicity of analyses, results from similar studies, and other relevant evidence                                                                                                                                                                                                                                    | 7                 |
| Generalisability         | 21  | Discuss the generalisability (external validity) of the study results                                                                                                                                                                                                                                                                                                                                         | 8                 |
| <b>Other information</b> |     |                                                                                                                                                                                                                                                                                                                                                                                                               |                   |
| Funding                  | 22  | Give the source of funding and the role of the funders for the present study and, if applicable, for the original study on which the present article is based                                                                                                                                                                                                                                                 | 10                |

\*Give information separately for cases and controls in case-control studies and, if applicable, for exposed and unexposed groups in cohort and cross-sectional studies.

**Note:** An Explanation and Elaboration article discusses each checklist item and gives methodological background and published examples of transparent reporting. The STROBE checklist is best used in conjunction with this article (freely available on the Web sites of PLoS Medicine at <http://www.plosmedicine.org/>, Annals of Internal Medicine at <http://www.annals.org/>, and Epidemiology at <http://www.epidem.com/>). Information on the STROBE Initiative is available at [www.strobe-statement.org](http://www.strobe-statement.org).



# BMJ Open

## COVID-19-related social support service closures and mental well-being in older adults and those affected by dementia: A UK longitudinal survey

|                                 |                                                                                                                                                                                                                                                                                                                                                                                                                                                                                                                                                                                                                                                                                                                                                                                                                                                                                                                                                                                                                                                                                                                                                                                                                                                                                                       |
|---------------------------------|-------------------------------------------------------------------------------------------------------------------------------------------------------------------------------------------------------------------------------------------------------------------------------------------------------------------------------------------------------------------------------------------------------------------------------------------------------------------------------------------------------------------------------------------------------------------------------------------------------------------------------------------------------------------------------------------------------------------------------------------------------------------------------------------------------------------------------------------------------------------------------------------------------------------------------------------------------------------------------------------------------------------------------------------------------------------------------------------------------------------------------------------------------------------------------------------------------------------------------------------------------------------------------------------------------|
| Journal:                        | <i>BMJ Open</i>                                                                                                                                                                                                                                                                                                                                                                                                                                                                                                                                                                                                                                                                                                                                                                                                                                                                                                                                                                                                                                                                                                                                                                                                                                                                                       |
| Manuscript ID                   | bmjopen-2020-045889.R2                                                                                                                                                                                                                                                                                                                                                                                                                                                                                                                                                                                                                                                                                                                                                                                                                                                                                                                                                                                                                                                                                                                                                                                                                                                                                |
| Article Type:                   | Original research                                                                                                                                                                                                                                                                                                                                                                                                                                                                                                                                                                                                                                                                                                                                                                                                                                                                                                                                                                                                                                                                                                                                                                                                                                                                                     |
| Date Submitted by the Author:   | 03-Jan-2021                                                                                                                                                                                                                                                                                                                                                                                                                                                                                                                                                                                                                                                                                                                                                                                                                                                                                                                                                                                                                                                                                                                                                                                                                                                                                           |
| Complete List of Authors:       | Giebel, Clarissa; University of Liverpool, Institute of Psychology, Health and Society<br>Pulford, Daniel; Lancashire Care NHS Foundation Trust<br>Cooper, Claudia; University College London<br>Lord, Kathryn; University of Bradford<br>Shenton, Justine; Sefton Older People's Forum<br>Cannon, Jacqui; Lewy Body Society<br>Shaw, Lisa; University of Liverpool, Institute of Psychology, Health and Society<br>Tetlow, Hilary; SURF Liverpool<br>Limbert, Stan; NIHR ARC NWC<br>Callaghan, Steve; EQE Health<br>Whittington, Rosie; Me2U Care<br>Rogers, Carol; National Museums Liverpool<br>Komuravelli, Aravind; North West Boroughs Healthcare NHS Foundation Trust<br>Rajagopal, Manoj; Lancashire Care NHS Foundation Trust<br>Eley, Ruth; Liverpool DAA<br>Downs, Murna; University of Bradford, Bradford Dementia Group<br>Reilly, Siobhan; Lancaster University, Division of Health Research<br>Ward, Kym; The Brain Charity<br>Gaughan, Anna; TIDE<br>Butchard, Sarah; University of Liverpool, Institute of Psychology, Health and Society<br>Beresford, Jules; University of Bradford<br>Watkins, Caroline; University of Central Lancashire, Faculty of Health and Wellbeing<br>Bennett, Kate; University of Liverpool, Institute of Psychology, Health and Society<br>Gabbay, Mark |
| <b>Primary Subject Heading</b>: | Public health                                                                                                                                                                                                                                                                                                                                                                                                                                                                                                                                                                                                                                                                                                                                                                                                                                                                                                                                                                                                                                                                                                                                                                                                                                                                                         |
| Secondary Subject Heading:      | Mental health                                                                                                                                                                                                                                                                                                                                                                                                                                                                                                                                                                                                                                                                                                                                                                                                                                                                                                                                                                                                                                                                                                                                                                                                                                                                                         |
| Keywords:                       | Dementia < NEUROLOGY, COVID-19, MENTAL HEALTH, Old age psychiatry < PSYCHIATRY                                                                                                                                                                                                                                                                                                                                                                                                                                                                                                                                                                                                                                                                                                                                                                                                                                                                                                                                                                                                                                                                                                                                                                                                                        |

1  
2  
3  
4  
5  
6  
7  
8  
9  
10  
11  
12  
13  
14  
15  
16  
17  
18  
19  
20  
21  
22  
23  
24  
25  
26  
27  
28  
29  
30  
31  
32  
33  
34  
35  
36  
37  
38  
39  
40  
41  
42  
43  
44  
45  
46  
47  
48  
49  
50  
51  
52  
53  
54  
55  
56  
57  
58  
59  
60



SCHOLARONE™  
Manuscripts



I, the Submitting Author has the right to grant and does grant on behalf of all authors of the Work (as defined in the below author licence), an exclusive licence and/or a non-exclusive licence for contributions from authors who are: i) UK Crown employees; ii) where BMJ has agreed a CC-BY licence shall apply, and/or iii) in accordance with the terms applicable for US Federal Government officers or employees acting as part of their official duties; on a worldwide, perpetual, irrevocable, royalty-free basis to BMJ Publishing Group Ltd ("BMJ") its licensees and where the relevant Journal is co-owned by BMJ to the co-owners of the Journal, to publish the Work in this journal and any other BMJ products and to exploit all rights, as set out in our [licence](#).

The Submitting Author accepts and understands that any supply made under these terms is made by BMJ to the Submitting Author unless you are acting as an employee on behalf of your employer or a postgraduate student of an affiliated institution which is paying any applicable article publishing charge ("APC") for Open Access articles. Where the Submitting Author wishes to make the Work available on an Open Access basis (and intends to pay the relevant APC), the terms of reuse of such Open Access shall be governed by a Creative Commons licence – details of these licences and which [Creative Commons](#) licence will apply to this Work are set out in our licence referred to above.

Other than as permitted in any relevant BMJ Author's Self Archiving Policies, I confirm this Work has not been accepted for publication elsewhere, is not being considered for publication elsewhere and does not duplicate material already published. I confirm all authors consent to publication of this Work and authorise the granting of this licence.

1  
2  
3  
4  
5  
6  
7  
8  
9  
10  
11  
12  
13  
14  
15

## COVID-19-related social support service closures and mental well-being in older adults and those affected by dementia: A UK longitudinal survey

16  
17  
18  
19  
20  
21  
22  
23  
24  
25  
26  
27  
28  
29  
30  
31  
32  
33  
34  
35  
36  
37  
38  
39  
40  
41  
42  
43  
44  
45  
46  
47  
48  
49  
50  
51  
52  
53  
54  
55  
56  
57  
58  
59  
60

**Clarissa Giebel<sup>1,2,\*</sup>, Daniel Pulford<sup>3</sup>, Claudia Cooper<sup>4</sup>, Kathryn Lord<sup>5</sup>, Justine Shenton<sup>6</sup>, Jacqueline Cannon<sup>7</sup>, Lisa Shaw<sup>8</sup>, Hilary Tetlow<sup>9</sup>, Stan Limbert<sup>2</sup>, Steve Callaghan<sup>10</sup>, Rosie Whittington<sup>11</sup>, Carol Rogers<sup>12</sup>, Aravind Komuravelli<sup>13</sup>, Manoj Rajagopal<sup>3</sup>, Ruth Eley<sup>14</sup>, Murna Downs<sup>5</sup>, Siobhan Reilly<sup>5</sup>, Kym Ward<sup>15</sup>, Anna Gaughan<sup>16</sup>, Sarah Butchard<sup>17</sup>, Jules Beresford<sup>5</sup>, Caroline Watkins<sup>2,18</sup>, Kate Bennett<sup>19</sup>, Mark Gabbay<sup>1,2</sup>**

1 Department of Primary Care & Mental Health, University of Liverpool, UK

2 NIHR ARC NWC, Liverpool, UK

3 Lancashire and South Cumbria NHS Trust, UK

4 Division of Psychiatry, UCL, UK

5 Centre for Applied Dementia Studies, University of Bradford, UK

6 Sefton Older People's Forum, Sefton, UK

7 Lewy Body Society, Wigan, UK

8 Department of Modern Languages and Cultures, University of Liverpool, UK

9 SURF Liverpool, UK

10 EQE Health, Liverpool, UK

11 Me2U Care, Liverpool, UK

12 National Museums Liverpool, UK

13 North West Boroughs NHS Trust, Warrington, UK

14 Liverpool Dementia Action Alliance, UK

15 The Brain Charity, Liverpool, UK

16 TIDE, Liverpool, UK

17 Mersey Care NHS Trust, Liverpool, UK

18 Department of Health Research, UCLAN, UK

19 School of Psychology, University of Liverpool, UK

\*Correspondence should be addressed to: Clarissa Giebel, Waterhouse Building, University of Liverpool, Liverpool, L69 3GL. Email: [Clarissa.giebel@liverpool.ac.uk](mailto:Clarissa.giebel@liverpool.ac.uk)

## Abstract

**Background:** The COVID-19 pandemic has had a major impact on delivery of social support services. This might be expected to particularly affect older adults and people living with dementia (PLWD), and to reduce their wellbeing.

**Aims:** To explore how social support service use by older adults, carers, and PLWD, and their mental wellbeing changed over the first three months since the pandemic outbreak.

**Methods:** Unpaid dementia carers, PLWD, and older adults took part in a longitudinal online or telephone survey collected in April-May 2020, and at two subsequent time points 6 and 12 weeks after baseline. Participants were asked about their social support service usage in a typical week prior to the pandemic (at baseline), and in the past week at each of the three time points. They also completed measures of levels of depression, anxiety and mental well-being.

**Results:** 377 participants had complete data at all three time points. Social support service usage dropped shortly after lockdown measures were imposed at timepoint 1 (T1), to then increase again by T3. The access to paid care was least affected by COVID-19. Cases of anxiety dropped significantly across the study period, whilst cases of depression rose. Well-being increased significantly for older adults and PLWD from T1 to T3.

**Conclusions:** Access to social support services has been significantly affected by the pandemic, which is starting to recover slowly. With mental well-being differently affected across groups, support needs to be put in place to maintain better well-being across those vulnerable groups during the ongoing pandemic.

### Strengths and limitations of this study

- Data on social support service usage and mental health were collected at three time points in the early stages of the pandemic
- 63% of participants completed all three survey time points
- The survey was co-produced with people affected by dementia
- The study was mostly completed by people from a White ethnic background, and lacks ethnic minority representation despite actively approaching community groups
- Some people with dementia completed the survey, who may have had difficulties in recalling the services they received pre-pandemic

For peer review only

## Introduction

In the UK, 11.9 million people are aged 65 and over [1], with over 850,000 living with dementia [2]. Social support services, including day care centres, support groups, paid home carers, and community activities, such as singing or arts groups, are important for maintaining a good quality of life for older people and people living with dementia (PLWD) [3-4]. In view of an ageing population and increasing numbers of PLWD, easily accessible services are crucial to support people socially, as well as with their care needs.

The COVID-19 pandemic has affected these social support services significantly. Social isolation as a result of social distancing, lockdowns, and shielding is a huge concern for older people across the globe since the beginning of the pandemic [5-6], with similar issues highlighted early for PLWD [7]. However, there is still a dearth of evidence on the mental well-being and access to care for those in need.

Specifically, in the UK, a nationwide three-month lockdown was imposed on the 23<sup>rd</sup> of March. Older people were over-represented in the group who were clinically extremely vulnerable, that is at greatest risk of severe illness from COVID-19, who were asked to shield by the government until early August. All adults aged 70+ were classified as being at least moderate risk of severe illness from COVID-19 [8]. During the most restrictive, earlier period of lockdown, people were advised to only go outside once a day for essential food shopping, pharmacy visits, or to exercise. Non-essential shops were closed, and only started reopening in July. With additional social distancing for the general population, and use of personal protective equipment (PPE) for the health and social care workforce in place, these measures significantly impact the social support services that PLWD, carers, and older adults could receive. Recent qualitative evidence has highlighted how PLWD and unpaid carers have faced a sudden crisis in terms of accessing social support services since the pandemic [9], and have faced difficult decisions whether to continue or discontinue paid carers entering the home of the PLWD, for fear of potential virus transmission [10]. Whilst these qualitative accounts provide rich information on the experiences of having accessed (or failed to access) social support services during the pandemic, there appears to be no empirical evidence to date quantifying those experiences and linking these with mental well-being.

The aim of this exploratory study was to explore the impacts of COVID-19 on social support service closures and longitudinal changes in the mental illness and well-being of older adults, PLWD, and unpaid carers. Considering the new emergence of this field and thus lack of previous evidence, we hypothesised that would be associated with reduced social support service provision, which in turn was hypothesised to be associated with poorer mental health.

## Methods

### Participants and recruitment

We recruited UK residents who were aged 18+. PLWD were eligible to take part if they had a diagnosis of dementia. Unpaid carers were eligible to take part if they were (current carers) or had been caring for a relative or friend with dementia (former carers). Older adults were eligible to take part if they were aged 65 years or older.

Participants were recruited via different social support services third sector organisations, such as peer support group organisations, carer networks, cultural dementia training programme organisations, and national dementia subtype specific organisations, and by contacting people on their email circulation lists, via newsletters and social media accounts. We also directly contacted people who were accessing regular services, such as support groups or older people fora, via telephone. This ensured that people without internet access were able to participate in this research. We also utilised *Join Dementia Research*, a UK-wide

national online register of PLWD, carers, older adults, and health volunteers who are interested in taking part in dementia and ageing research.

Ethical approval was obtained from the University of Liverpool prior to study begin [Ref: 7626].

### Data collection

The study was completed at three time points (T1, T2, T3), 5 and 6 weeks apart, respectively. Participants could complete the survey either online or over the phone with a research team member who entered their details into the online survey on their behalf. Participants from T1 (baseline) were followed-up with the same mental well-being questionnaires at T2 and T3 and were followed-up either by telephone or email, depending on how they completed T1 survey. T1 ran from 17<sup>th</sup> April to 15<sup>th</sup> May (+/- 3 days). T2 ran from 29<sup>th</sup> May to 26<sup>th</sup> June (+/- 3 days). T3 ran from 10<sup>th</sup> July to 7<sup>th</sup> August (+/- 3 days).

### Variables and tools

At T1, participants were asked about their background characteristics (including age, gender, ethnicity, postcode, living situation, type of dementia (if applicable), and employment). Postcode data were collected to generate an Index of Multiple Deprivation (IMD) quintile. IMD provides a measure of neighbourhood deprivation, taking into account income, education, crime, and health, amongst others. Quintile 1 indicates least deprived neighbourhoods, with quintile 5 indicating the most deprived neighbourhoods.

Service usage was measured by asking about pre-pandemic and current receipt of different social support services (including paid carers, support groups, befrienders, day care centres, respite, meal deliveries, transport, social activities, clinical mental health support, and clinical physical support) and equipment, such as hand rails or shower seats, as well as the weekly total hours of social support services. Pre-pandemic service usage was defined as use of social support services in a typical week before the pandemic.

Participants were also asked to complete the Personalised Health Questionnaire 9 (PHQ-9) [11] for levels of depressive symptoms, the Generalised Anxiety Disorder 7 (GAD-7) [12] for levels of anxiety symptoms, and the Short Warwick-Edinburgh Mental Well-Being Scale [13] (SWEMWBS) for quality of life. Higher scores on the PHQ-9, GAD-7, and the SWEMWBS indicated higher levels of depressive symptomatology, anxiety symptomatology, and quality of life, respectively. We categorised participants who scored of 10 or more on the PHQ-9 as 'depressed' and on the GAD-7 as 'anxious', as based on previous extensive research, indicating that these cut offs indicate general anxiety disorder and depression, respectively [14]. At T2 and T3, participants were asked again about their current levels of social support service receipt, weekly hours of support, equipment, as well as the PHQ-9, GAD-7, and SWEMWBS.

### Data analysis

Data were analysed using SPSS 25, and the significance level was set at  $p < 0.05$ . Participant demographic characteristics and social support service usage and mental well-being variables were analysed using frequency analysis. Chi-square tests were used to assess variations in the proportions of participants who were categorised as 'depressed' or 'anxious'. Repeated measures ANOVAs with Greenhouse Geisser posthoc correction were used to analyse differences between T1, T2, and T3 in GAD-7 total, PHQ-9 total, and SWEMWBS total scores. For this analysis, only participants with complete GAD-7, PHQ-9, and SWEMWBS were included ( $n=377$ ). Paired samples t-tests were employed to compare the means of GAD-7,



PHQ-9, and SWEMWBS at T1 between those who completed all three time points (n=377) and those who dropped out after T1 or T2 (n=192). Bivariate correlation analysis was employed to assess whether changes in weekly social support service usage from pre-pandemic to T1 were associated with changes in GAD-7, PHQ-9, and SWEMWBS between T1 and T3.

### Public involvement

Unpaid carers and a PLWD were involved as equal team members in all aspects of the study – from conceptualisation and design through to analysis and dissemination.

## Results

### Survey completion

Figure 1 outlines the participant flow and completion rates in further detail. 569 participants completed the survey at T1 (61 PLWD; 219 current carers; 66 former carers; 223 older adults). 420 participants completed the survey at T2 (38 PLWD; 168 current carers; 45 former carers; 169 older adults). 377 participants completed all three waves of the survey (37 PLWD; 149 current carers; 39 former carers; 152 older adults).

### Participant characteristics

Table 1 shows the demographic characteristics of those who completed T1 and those that completed all three survey time points, by subgroup. For those who completed all three time points, carers and older adults were mostly female (59-82%), whilst the majority of PLWD were male (62%). The majority of participants were from a White ethnic background (95-99%) and lived with someone else (61-88%), with current carers having the highest proportion of living with someone else. The majority of participants across all four groups lived in less deprived neighbourhoods (Quintiles 1 and 2) (52-61%). Thirty-seven PLWD took part in all three time points; the most common diagnostic subtype was Alzheimer's disease.

### [Figure 1 and Table 1]

### Social support service and activities usage

Participants had accessed a range of social support services pre-pandemic, including day care centres, support groups, meal deliveries, respite, and paid carers. Figure 2 (A) shows the proportion of participants of the total sample (n=377) who reported accessing paid carers, support groups, day care, befrienders, and social activities prior to the pandemic, and at T1, T2, and T3. These were the most commonly used types of social support services prior to the pandemic. Social support services usage had dropped since the pandemic outbreak. Pre-pandemic, 27% of participants accessed social activities in the community, which dropped to 6% at T1, T2, and T3. Paid care saw the smallest change – with 17% having accessed paid carers pre-pandemic, dropping to 12% at T1 and increasing slightly again to 15% at T3. Day care saw the largest drop, with only 1-2 % receiving day care since the outbreak, compared to 15% previously.

Figure 2 (B) shows the proportion of participants by group who have received any form of social support services pre-pandemic and at all three survey time points. Pre-pandemic, 90% of current carers had received social support of any form, with between 45% and 50% of former carers and older adults having received some support. This decreased at T1 for all groups to between 20% (older adults) to 55% (current carers) receiving some type of support. Through T2 and T3, an upward trend emerged with more participants gaining access to some services again, with levels for PLWD and former carers being higher at T3 than at pre-pandemic levels.

### [Figure 2]

### Mental well-being

Figure 3 shows the proportion of participants across the total sample (n=377) who were categorised and identified as anxious and depressed, based on scoring above the GAD-7 and PHQ-9 cut off, across all three time points. For anxiety, we noted a downward trend in number of cases from T1 (16.5%) to T3 (14.1%). The proportion of participants with anxiety was significantly lower at T2 ( $\chi^2=186.399$ ,  $p<0.001$ ) and T3 ( $\chi^2=136.562$ ,  $p<0.001$ ) compared to T1. For depression, we noted an upward trend in cases, as indicated based on their cut off on the PHQ-9, from T1 (14.4%) to T3 (17.5%). The proportion of participants with depression was significantly higher at T2 ( $\chi^2=176.248$ ,  $p<0.001$ ) and T3 ( $\chi^2=158.031$ ,  $p<0.001$ ) compared to T1.

Figure 4 shows the median of the GAD-7, PHQ-9, and SWEMWBS total scores by group over time for those who completed all three survey time points. Based on the median scores, levels of anxiety and depression appear to decrease from T1 to T3, whilst quality of life increases from T1 to T3.

Paired samples t-test showed that there were no significant differences in means of GAD-7 ( $p=.468$ ), PHQ-9 ( $p=.183$ ), and SWEMWBS ( $p=.332$ ) at T1 between those who completed all three survey time points and those who dropped out after T1 or T2.

For anxiety, repeated-measures ANOVAs with Greenhouse-Geisser posthoc correction showed that GAD-7 total scores did not vary significantly from T1 to T3 for PLWD [ $F(1.856, 64.962)=1.429$ ,  $p=0.247$ ] or among current carers [ $F(1.898, 277.063)=1.938$ ,  $p=0.148$ ], former carers [ $F(1.801, 68.419)=.139$ ,  $p=.139$ ], or older adults [ $F(1.924, 286.727)=2.688$ ,  $p=.0072$ ], based on those participants who completed in all three survey time points.

For depression, repeated-measures ANOVAs showed that PHQ-9 total scores did not significantly vary from T1 to T3 for PLWD [ $F(1.896, 66.370)=1.461$ ,  $p=0.240$ ], current carers [ $F(1.900, 277.453)=.639$ ,  $p=0.521$ ], former carers [ $F(1.677, 68.419)=.024$ ,  $p=0.960$ ], or older adults [ $F(1.889, 281.414)=.857$ ,  $p=0.420$ ].

For well-being, repeated-measures ANOVAs showed that SWEMWBS total scores significantly increased from T1 to T3 for PLWD [ $F(1.726, 60.423)=5.412$ ,  $p<0.05$  [Mean(SD) T1-T3= 22.1(6.4); 24.3(5.6); 24.4(5.6)]] and older adults [ $F(1.804, 268.807)=3.632$ ,  $p<0.05$  [Mean(SD) T1-T3= 27.5(5.1); 28.0(5.1); 28.3(4.9)]]. However there were no significant changes among current [ $F(1.982, 289.325)=2.185$ ,  $p=0.115$ ] or former carers [ $F(1.728, 63.725)=.268$ ,  $p=0.733$ ].

### [Figure 3 and 4]

#### Social support and mental health

Bivariate correlation analyses showed no significant associations between variations in social support service hours between pre-pandemic and at T1 and changes in SWEMWBS ( $p=.332$ ), GAD-7 ( $p=.310$ ), and PHQ-9 ( $p=.351$ ) between T1 and T3 for those who completed all three survey time points.

### Discussion

This is one of the first studies to show that social support service usage in dementia and ageing reduced significantly compared to pre-pandemic levels, whilst slowly rising in the months post-nationwide lockdown. In addition, we also show that cases of anxiety reduced whilst cases of depression increased in the months since lockdown, with quality of life significantly increasing for PLWD and older adults only.

Social support service usage for PLWD, unpaid carers, and older adults has seen a significant decrease since the COVID-19 pandemic, leaving many people suddenly without vital support – ranging from day care centres to respite to support groups. In the months

1  
2  
3 following the nationwide lockdown, usage has gradually increased again but varied among  
4 providers and type of support. With public health restrictions still remaining in place however  
5 during that period, including social distancing, shielding and thus inability to meet members of  
6 different households, such support is most likely to be implemented via digital technologies.  
7 Considering that in our sample 94% of participants completed the survey online rather than  
8 the telephone option, nearly all participants had access to the internet. However, many older  
9 adults and PLWD are less likely to be digitally literate [15], making it difficult for all people to  
10 access services equally. This has already been an issue pre-COVID-19 [16], suggesting that  
11 the pandemic has further exacerbated potential inequalities in access and thus further isolated  
12 people who would benefit from social support the most.  
13

14 One type of support which has been affected the least by the pandemic has been paid  
15 home care. Receiving paid home care enables PLWD and older adults to stay at home  
16 independently for longer – as people wish to avoid entering a care home and stay in their  
17 familiar environment [17]. Whilst there was a reduction in paid home care usage compared to  
18 pre-pandemic levels, overall paid home carers were utilised the most. A qualitative exploration  
19 into decision-making for whether or not to continue paid home care during the pandemic has  
20 shown that many unpaid carers were afraid of having paid carers enter the home (often with  
21 inadequate PPE) for risk of potential virus transmission [10]. Other unpaid carers however felt  
22 unable to cope without the support, or indeed accepted the potential risks, and continued paid  
23 home care. There is also a notable difference between social care provision (which is paid  
24 home care) and third sector care provision (which involves support groups and social activities  
25 for example). The third sector relies on volunteers providing services, and has also suffered  
26 during the pandemic, whereas the social care sector is financially supported by the  
27 government. Therefore, the ability to receive home care might not have been affected to the  
28 same extent as accessing support groups for instance. Another potential reason for variations  
29 in usage between activity types is that home care involves someone from the outside entering  
30 someone's home. In contrast, day care centres, respite care, and social activities involve older  
31 adults and PLWD going outside to larger social gatherings. Due to public health restrictions,  
32 these have been temporarily rendered largely, if not completely, impossible to take place in  
33 their original face-to-face formats. As numbers of infections rise again, these restrictions are  
34 being strengthened and re-imposed with large fines possible for those transgressing them.  
35

36 Levels of anxiety, depression, and well-being changed over the course of the study  
37 period. Over 12 weeks, cases of anxiety across the total sample dropped, whilst cases of  
38 depression increased significantly. However, when exploring levels of anxiety and depression  
39 within groups, no significant changes were noted, which is likely to have been due to small  
40 and varied sample sizes for each subgroup. Similarly, no significant variations in levels of  
41 anxiety, depression, and mental well-being were found between those who completed all three  
42 survey time points, and those who had dropped out after T1 or T2. It is possible that  
43 participants felt more connected over time, particularly considering again that the majority of  
44 participants completed the survey online and thus were able to participate in remote services,  
45 where these existed. Recent evidence from Spain showed how older adults were less likely to  
46 suffer from psychological distress as a result of the pandemic than people aged below 60 [18].  
47 Nevertheless, overall the pandemic is having a heightened impact on the mental health of the  
48 general population [19-20]. Engaging in social activities can be one avenue to help maintain  
49 good mental health [21]. Considering that reductions in social engagement both before and  
50 after a dementia diagnosis are common [22], enabling continued engagement throughout the  
51 pandemic is important to support PLWD, carers, and older adults adequately. This is  
52 corroborated by evidence from the baseline survey showing that reductions in social support  
53 usage were linked to mental well-being [23]. It is possible that for this study, merging groups  
54 of older adults, PLWD, and carers resulted in no significant associations, as each group was  
55  
56  
57  
58  
59  
60

1  
2  
3 differently affected, as indicated by looking at changes of mental well-being for each group  
4 across the 12 weeks.

5  
6 There were some limitations to our exploratory study. Whilst benefitting from a large  
7 sample size and good retention rate over a relatively short time period of 12 weeks, there was  
8 some missing data and not everyone completed all three survey time points. However, this is  
9 standard in longitudinal survey-based research, and we still generated a large sample size  
10 across all three time points. By comparing those who completed all three survey time points  
11 and those who dropped out after T1 or T2, we established that there no significant differences  
12 in their mental health scores. Concerning the participant population, it is to be noted that the  
13 majority of participants had internet access and were thus also able to join in remote social  
14 support. Although we actively approached older adults, PLWD, and carers via phone through  
15 recruiting organisations, only some people took part over the phone. It is likely however that  
16 those people without internet access have been even more isolated through the pandemic,  
17 with potentially severe mental health needs, which we have only captured a snapshot of. This  
18 also links to the fact that there are likely to be longer-term effects on mental well-being, with  
19 our survey only providing a snap shot of the first few months since the start of the pandemic.  
20 Equally, our survey did not include pre-pandemic levels of mental well-being (anxiety,  
21 depression, and quality of life), which would have provided additional insight into changes in  
22 mental well-being. However, due to the unforeseen circumstance of the pandemic, it was not  
23 feasible to collect these data. We only enquired about weekly hours of total social support  
24 usage, and not for each specific type of activity. Some participants might have accessed, for  
25 example, paid home care, but only for two hours as opposed to others who might have  
26 received 40 hours a week. We are thus unable to state in detail how the pandemic has affected  
27 the level of each different type of support, but instead we provide a more general overview of  
28 activities and general service usage variations since the nationwide lockdown, which to  
29 existing knowledge has not been captured elsewhere.  
30  
31  
32  
33

## 34 **Conclusions**

35  
36 The pandemic is having a sudden and severe long-term impact on social support service  
37 usage for older adults and people affected by dementia, which sees somewhat of a limited  
38 increase in usage over the first few months since nationwide lockdown. Whilst it appears that  
39 some services have started providing remote support, not everyone will be able to access  
40 these, leaving many people without much needed support. Future research needs to assess  
41 how older adults and people affected by dementia are accessing social support services in  
42 the time of COVID-19, with clearer support for people to access any format of services – either  
43 face-to-face or remotely. Considering that the pandemic is going to continue for the  
44 foreseeable future, the mental health of older adults and those affected by dementia needs to  
45 be closely monitored, particularly when more stringent public health measures are put in place  
46 again.  
47  
48  
49  
50  
51  
52  
53  
54  
55  
56  
57  
58  
59  
60

**Conflicts of interest**

None.

**Acknowledgements**

This study would not have been possible without our participants, thank you very much. We also wish to thank Join Dementia Research for helping us recruit to our study.

**Funding**

This research is supported by a grant awarded to the authors by the University of Liverpool COVID-19 Strategic Research Fund in 2020. This is also independent research funded by the National Institute for Health Research Applied Research Collaboration North West Coast (ARC NWC). The views expressed in this publication are those of the author(s) and not necessarily those of the National Institute for Health Research or the Department of Health and Social Care. The University of Bradford QR Research Fund also supported part of this study. There are no grant numbers.

**Data availability statement**

Data may be obtained from a third party and are not publicly available.

**Author contributions**

CG managed data collection, conducted analysis, and wrote the manuscript. JC, JS, and DP collected data over the phone. DP managed the data. All authors (CG, DP, CC, KL, JS, JC, LS, HT, SL, SC, RW, CR, AK, MR, RE, MD, SR, KW, AG, SB, JB, CW, KB, MG) contributed to designing the survey, interpreting the findings, and reading drafts of the manuscript. All authors approved the final manuscript. Emma Riley helped with recruitment by emailing eligible participants via the House of Memories networks and we wish to thank her for her support with this.

## Figure Captions

### Figure 1. Flow of participation in longitudinal survey

**NOTE.** The top boxes indicate how many people completed each survey time point. After having removed (1) duplicates (people who completed the survey twice), (2) missing cases (where participants had not completed the PHQ-9, GAD-7, and the SWEMWBS or had missing ID codes at T2 and T3), and (3) losses to follow-up (those that had either completed T1 or T1 and T2 only), and (4) incomplete data at T1 yet data at T2 or T3, 377 cases remained in total. Grey boxes indicate the breakdown by subgroup.

<sup>1</sup> Follow-up completion by subgroup by percentage at T2 and T3 compared to T1: PLWD 69%(T2), 67%(T3); Current Carers 86%(T2), 75%(T3); Former carers 64%(T2), 60%(T3); Older adults 79%(T2), 69%(T3).

### Figure 2. Social support service usage pre-pandemic and at 3 survey time points

**Note.** (A) Service usage for the total sample (N=377) in proportion of participants at four different time points for some of the most frequently used support services. (B) Proportion of participants within each group at four different timepoints (pre-pandemic, T1, T2, T3) having received any form of social support.

### Figure 3. Proportion of the total sample who scored above the cut offs for anxiety and depression at three time points

**NOTE.** T = Time point

The graph shows the proportion of participants from the total sample who completed all three surveys (n=377) and scored above the cut off on the GAD-7 and PHQ-9 for anxiety and depression, respectively.

### Figure 4. Variations in anxiety, depression, and quality of life total scores at 3 time points

**NOTE.** Figures show the median total score at each time point (T1, T2, T3) for each subgroup – for anxiety (GAD-7), depression (PHQ-9), and quality of life (SWEMWBS).

## References

- 1  
2  
3 [1] Office for National Statistics (ONS). *Living longer: is age 70 the new age 65?* London, England 2019: ONS.
- 4  
5  
6 [2] Alzheimer's Society. *Dementia UK: An Update*. London, England: Alzheimer's Society  
7 2014.
- 8  
9 [3] Skingley A, Martin A, Clift S. The contribution of community singing groups to the well-  
10 being of older people: participant perspectives from the United Kingdom. *Journal of*  
11 *Applied Gerontology* 2016;35(12):1302-1324.
- 12  
13 [4] Tretteteig S, Vatne S, Mork Rokstad AM. The influence of day care centres designed  
14 for people with dementia on family caregivers – a qualitative study. *BMC Geriatrics*  
15 2017;17(5).
- 16  
17 [5] Armitage R, Nellums LB. COVID-19 and the consequences of isolating elderly.  
18 *LANCET Public Health* 2020; 5(5):doi: 10.1016/S2468-2667(20)30061-X
- 19  
20 [6] Berg-Weger M, Morley JE. Loneliness and social isolation in older adults during the  
21 COVID-19 pandemic: implications for gerontological social work. *Journal of Nutrition,*  
22 *Health & Ageing* 2020;24(5):456-458.
- 23  
24 [7] Brown EE, Kumr S, Rajji TK, et al. Anticipating and mitigating the impact of the COVID-  
25 19 pandemic on Alzheimer's disease and related dementias. *American Journal of*  
26 *Geriatric Psychiatry* 2020;28(7):712-721.
- 27  
28 [8] Public Health England (PHE). *Guidance on shielding and protecting people who are*  
29 *clinically extremely vulnerable from COVID-19*. London, England 2020: PHE. Last  
30 accessed 22<sup>nd</sup> September 2020: [https://www.gov.uk/government/publications/guidance-](https://www.gov.uk/government/publications/guidance-on-shielding-and-protecting-extremely-vulnerable-persons-from-covid-19/guidance-on-shielding-and-protecting-extremely-vulnerable-persons-from-covid-19#definition)  
31 [on-shielding-and-protecting-extremely-vulnerable-persons-from-covid-19/guidance-on-](https://www.gov.uk/government/publications/guidance-on-shielding-and-protecting-extremely-vulnerable-persons-from-covid-19/guidance-on-shielding-and-protecting-extremely-vulnerable-persons-from-covid-19#definition)  
32 [shielding-and-protecting-extremely-vulnerable-persons-from-covid-19#definition](https://www.gov.uk/government/publications/guidance-on-shielding-and-protecting-extremely-vulnerable-persons-from-covid-19/guidance-on-shielding-and-protecting-extremely-vulnerable-persons-from-covid-19#definition)
- 33  
34 [9] Giebel C, Cannon J, Hanna K, et al. Impact of Covid-19 related social support service  
35 closures on people with dementia and unpaid carers: A qualitative study. *Aging &*  
36 *Mental Health* 2020a; doi: 10.1080/13607863.2020.1822292
- 37  
38 [10] Giebel C, Hanna K, Cannon J, et al. Decision-making for receiving paid home care for  
39 dementia in the time of COVID-19: A qualitative study. *BMC Geriatrics* 2020b; doi:  
40 10.1186/s12877-020-01719-0
- 41  
42  
43 [11] Kroenke K, Spitzer RL, Williams JB. The PHQ-9: validity of a brief depression severity  
44 measure. *Journal of General Internal Medicine* 2001;16(9):606-613.
- 45  
46 [12] Spitzer RL, Kroenke K, Williams JB, Loewe B. A brief measure for assessing  
47 generalized anxiety disorder: the GAD-7. *Archives of Internal Medicine*  
48 2006;166(10):1092-1097.
- 49  
50 [13] Haver A, Akerjordet K, Caputi P, et al. Measuring mental well-being: A validation of the  
51 Short Warwick-Edinburgh Mental Well-Being Scale in Norwegian and Swedish.  
52 *Scandinavian Journal of Public Health* 2015;43(7):721-727.
- 53  
54 [14] Smith, B.W., Epstein, E.E., Oritz, J.A., Christopher, P.K., & Tooley, E.M. (2013). The  
55 Foundations of Resilience: What are the critical resources for bouncing back from  
56 stress? In Prince-Embury, S. & Saklofske, D.H. (Eds.), *Resilience in children,*  
57 *adolescents, and adults: Translating research into practice*, The Springer series on  
58 human exceptionality (pp. 167-187). New York, NY: Springer.
- 59  
60

- 1  
2  
3 [15] Hill R, Betts LR, Gardner SE. Older adults' experiences and perceptions of digital  
4 technology: (Dis)empowerment, wellbeing, and inclusion. *Computers in Human*  
5 *Behavior* 2015;48: 415-423.  
6  
7 [16] Stephan A, Bieber A, Hopper L, et al. Barriers and facilitators to the access to and use  
8 of formal dementia care: findings of a focus group study with people with dementia,  
9 informal carers and health and social care professionals in eight European countries.  
10 *BMC Health Services Research* 2018; 131: doi: 10.1186/s12877-018-0816-1  
11  
12 [17] Rapaport P, Burton A, Leverton M, et al. "I just keep thinking that I don't want to rely  
13 on people." A qualitative study of how people living with dementia achieve and maintain  
14 independence at home: stakeholder perspectives *BMC Geriatrics* 2020; doi:  
15 10.1186/s12877-019-1406-6  
16  
17 [18] Garcia-Portilla P, de la Fuente Tomas L, Bobes-Bascaran T, et al. Are older adults  
18 also at higher psychological risk from COVID-19? *Aging & Mental Health* 2020; doi:  
19 10.1080/13607863.2020.1805723  
20  
21 [19] Fancourt D, Steptoe A, Bu F. Trajectories of depression and anxiety during enforced  
22 isolation due to COVID-10: longitudinal analyses of 59,318 adults in the UK with and  
23 without diagnosed mental illness. *medRxiv preprint* 2020; doi:  
24 10.1101/2020.06.03.20120923  
25  
26 [20] Job E, Steptoe A, Fancourt D. Abuse, self-harm and suicidal ideation in the UK during  
27 the COVID-19 pandemic. *British Journal of Psychiatry* 2020; doi:  
28 10.1192/bjp.2020.130  
29  
30 [21] Holtfreter K, Reisig MD, Turanovic JJ. Depression and infrequent participation in social  
31 activities among older adults: the moderating role of high-quality familial ties. *Aging &*  
32 *Mental Health* 2017;21(4): 10.1080/13607863.2015.1099036  
33  
34 [22] Hackett RA, Steptoe A, Cadar D, Fancourt D. Social engagement before and after  
35 dementia diagnosis in the English Longitudinal Study of Ageing. *PLOS One* 2019; doi:  
36 10.1371/journal.pone.0220195  
37  
38 [23] Giebel C, Lord K, Cooper C, et al. A UK survey of COVID-19 related social support  
39 service closures and the effects on older people, people with dementia, and carers.  
40 *International Journal of Geriatric Psychiatry* 2020c; doi: 10.1002/gps.5434  
41  
42  
43  
44  
45  
46  
47  
48  
49  
50  
51  
52  
53  
54  
55  
56  
57  
58  
59  
60



Table 1. Participant characteristics of those completing T1 survey and those completing all three survey time points

|                           | T1 (n=569)             |                        |                        |                       | T1, 2 and 3 (n=377)    |                        |                        |                       |
|---------------------------|------------------------|------------------------|------------------------|-----------------------|------------------------|------------------------|------------------------|-----------------------|
|                           | PLWD (n=61)            | Current carers (n=219) | Former carers (n=66)   | Older adults (n=223)  | PLWD (n=37)            | Current carers (n=149) | Former carers (n=39)   | Older adults (n=152)  |
| <b>N(%)</b>               |                        |                        |                        |                       |                        |                        |                        |                       |
| <b>Gender</b>             |                        |                        |                        |                       |                        |                        |                        |                       |
| <b>Female</b>             | 27 (44.3)              | 168 (77.1)             | 55 (83.3)              | 137 (61.7)            | 14 (37.8)              | 118 (79.7)             | 32 (82.1)              | 90 (59.2)             |
| <b>Male</b>               | 34 (55.7)              | 50 (22.9)              | 11 (16.7)              | 85 (38.3)             | 23 (62.2)              | 30 (20.3)              | 7 (17.9)               | 62 (40.8)             |
| <b>Ethnicity</b>          |                        |                        |                        |                       |                        |                        |                        |                       |
| <b>White</b>              | 58 (96.7)              | 211 (96.3)             | 65 (98.5)              | 216 (98.2)            | 35 (94.6)              | 143 (96.0)             | 38 (97.4)              | 148 (98.7)            |
| <b>Other</b>              | 2 (3.4)                | 8 (3.7)                | 1 (1.5)                | 4 (1.9)               | 2 (5.4)                | 6 (4.0)                | 1 (2.6)                | 2 (1.3)               |
| <b>Living situation</b>   |                        |                        |                        |                       |                        |                        |                        |                       |
| <b>Alone</b>              | 13 (21.3)              | 33 (15.1)              | 17 (26.2)              | 79 (35.6)             | 8 (21.6)               | 18 (12.2)              | 11 (28.9)              | 59 (39.1)             |
| <b>With someone</b>       | 48 (78.7)              | 185 (84.9)             | 48 (73.8)              | 143 (64.4)            | 29 (78.4)              | 130 (87.8)             | 27 (71.1)              | 92 (60.9)             |
| <b>IMD Quintile</b>       |                        |                        |                        |                       |                        |                        |                        |                       |
| <b>1</b>                  | 12 (23.1)              | 54 (32.1)              | 10 (19.2)              | 61 (33.5)             | 5 (16.1)               | 35 (31.0)              | 6 (19.4)               | 39 (31.7)             |
| <b>2</b>                  | 16 (30.8)              | 50 (29.8)              | 20 (38.5)              | 44 (24.2)             | 11 (35.5)              | 34 (30.1)              | 11 (35.5)              | 29 (23.6)             |
| <b>3</b>                  | 10 (19.2)              | 32 (19.0)              | 14 (26.9)              | 37 (20.3)             | 6 (19.4)               | 20 (17.7)              | 9 (29.0)               | 26 (21.1)             |
| <b>4</b>                  | 10 (19.2)              | 14 (8.3)               | 5 (9.6)                | 26 (14.3)             | 5 (16.1)               | 11 (9.7)               | 4 (12.9)               | 18 (14.6)             |
| <b>5</b>                  | 4 (7.7)                | 18 (10.7)              | 3 (5.8)                | 14 (7.7)              | 4 (12.9)               | 13 (11.5)              | 1 (3.2)                | 11 (8.9)              |
| <b>Type of dementia</b>   |                        |                        |                        |                       |                        |                        |                        |                       |
| <b>Alzheimer's</b>        | 20 (32.8)              | 100 (46.5)             | 6 (23.1)               |                       | 14 (37.8)              | 75 (50.7)              | 2 (20.0)               |                       |
| <b>Mixed</b>              | 13 (21.3)              | 49 (22.8)              | 7 (26.9)               |                       | 6 (16.2)               | 34 (23.0)              | 4 (40.0)               |                       |
| <b>Vascular</b>           | 11 (18.0)              | 27 (12.6)              | 4 (15.4)               |                       | 8 (21.6)               | 18 (12.2)              | 3 (30.0)               |                       |
| <b>Other</b>              | 17 (27.9)              | 39 (18.1)              | 9 (34.5)               |                       | 9 (24.3)               | 21 (14.1)              | 1 (10.0)               |                       |
| <b>Mean (SD), [Range]</b> |                        |                        |                        |                       |                        |                        |                        |                       |
| <b>Age</b>                | 70 (+/-10),<br>[45-88] | 61 (+/-13),<br>[23-89] | 64 (+/-14),<br>[22-95] | 72 (+/-6),<br>[65-90] | 72 (+/-10),<br>[50-88] | 62 (+/-13),<br>[23-89] | 65 (+/-13),<br>[22-95] | 73 (+/-6),<br>[65-90] |
| <b>Years of education</b> | 15 (+/-4),<br>[4-25]   | 16 (+/-4),<br>[6-28]   | 17 (+/-4),<br>[10-29]  | 17 (+/-4),<br>[7-25]  | 13 (+/-4),<br>[4-20]   | 16 (+/-4),<br>[6-28]   | 16 (+/-4),<br>[10-29]  | 16 (+/-4),<br>[7-24]  |

**NOTE.** 569 participants completed the survey at T1, with duplicates and missing cases removed. 377 participants had completed all three survey time points, with duplicates and missing cases removed.

PLWD – People living with dementia

1  
2  
3  
4  
5  
6  
7  
8  
9  
10  
11  
12  
13  
14  
15  
16  
17  
18  
19  
20  
21  
22  
23  
24  
25  
26  
27  
28  
29  
30  
31  
32  
33  
34  
35  
36  
37  
38  
39  
40  
41  
42  
43  
44  
45  
46  
47  
48  
49  
50  
51  
52  
53  
54  
55  
56  
57  
58  
59  
60

For peer review only

Figure 1. Flow of participation in longitudinal survey



147x102mm (144 x 144 DPI)

1  
2  
3  
4  
5  
6  
7  
8  
9  
10  
11  
12  
13  
14  
15  
16  
17  
18  
19  
20  
21  
22  
23  
24  
25  
26  
27  
28  
29  
30  
31  
32  
33  
34  
35  
36  
37  
38  
39  
40  
41  
42  
43  
44  
45  
46  
47  
48  
49  
50  
51  
52  
53  
54  
55  
56  
57  
58  
59  
60

Figure 2. Social support service usage pre-pandemic and at 3 survey time points



109x112mm (144 x 144 DPI)

Figure 3. Proportion of the total sample who scored above the cut offs for anxiety and depression at three time points



100x54mm (144 x 144 DPI)

**Figure 4. Variations in anxiety, depression, and quality of life total scores at 3 time points**



101x121mm (144 x 144 DPI)

## STROBE Statement—checklist of items that should be included in reports of observational studies

|                           | Item No | Page  | Recommendation                                                                                                                                                                                                                                                                                                                                                                                                                                                         |
|---------------------------|---------|-------|------------------------------------------------------------------------------------------------------------------------------------------------------------------------------------------------------------------------------------------------------------------------------------------------------------------------------------------------------------------------------------------------------------------------------------------------------------------------|
| <b>Title and abstract</b> | 1       | 1 & 2 | (a) Indicate the study's design with a commonly used term in the title or the abstract                                                                                                                                                                                                                                                                                                                                                                                 |
|                           |         | 1 & 2 | (b) Provide in the abstract an informative and balanced summary of what was done and what was found                                                                                                                                                                                                                                                                                                                                                                    |
| <b>Introduction</b>       |         |       |                                                                                                                                                                                                                                                                                                                                                                                                                                                                        |
| Background/rationale      | 2       | 4     | Explain the scientific background and rationale for the investigation being reported                                                                                                                                                                                                                                                                                                                                                                                   |
| Objectives                | 3       | 4     | State specific objectives, including any prespecified hypotheses                                                                                                                                                                                                                                                                                                                                                                                                       |
| <b>Methods</b>            |         |       |                                                                                                                                                                                                                                                                                                                                                                                                                                                                        |
| Study design              | 4       | 4-5   | Present key elements of study design early in the paper                                                                                                                                                                                                                                                                                                                                                                                                                |
| Setting                   | 5       | 4-5   | Describe the setting, locations, and relevant dates, including periods of recruitment, exposure, follow-up, and data collection                                                                                                                                                                                                                                                                                                                                        |
| Participants              | 6       | 4-5   | (a) <i>Cohort study</i> —Give the eligibility criteria, and the sources and methods of selection of participants. Describe methods of follow-up<br><i>Case-control study</i> —Give the eligibility criteria, and the sources and methods of case ascertainment and control selection. Give the rationale for the choice of cases and controls<br><i>Cross-sectional study</i> —Give the eligibility criteria, and the sources and methods of selection of participants |
|                           |         | 4-5   | (b) <i>Cohort study</i> —For matched studies, give matching criteria and number of exposed and unexposed<br><i>Case-control study</i> —For matched studies, give matching criteria and the number of controls per case                                                                                                                                                                                                                                                 |
| Variables                 | 7       | 5     | Clearly define all outcomes, exposures, predictors, potential confounders, and effect modifiers. Give diagnostic criteria, if applicable                                                                                                                                                                                                                                                                                                                               |
| Data sources/measurement  | 8*      | 5     | For each variable of interest, give sources of data and details of methods of assessment (measurement). Describe comparability of assessment methods if there is more than one group                                                                                                                                                                                                                                                                                   |
| Bias                      | 9       | n/a   | Describe any efforts to address potential sources of bias                                                                                                                                                                                                                                                                                                                                                                                                              |
| Study size                | 10      | 6     | Explain how the study size was arrived at                                                                                                                                                                                                                                                                                                                                                                                                                              |
| Quantitative variables    | 11      | 5     | Explain how quantitative variables were handled in the analyses. If applicable, describe which groupings were chosen and why                                                                                                                                                                                                                                                                                                                                           |
| Statistical methods       | 12      | 5     | (a) Describe all statistical methods, including those used to control for confounding                                                                                                                                                                                                                                                                                                                                                                                  |
|                           |         | 5     | (b) Describe any methods used to examine subgroups and interactions                                                                                                                                                                                                                                                                                                                                                                                                    |
|                           |         | 5     | (c) Explain how missing data were addressed                                                                                                                                                                                                                                                                                                                                                                                                                            |
|                           |         | 5     | (d) <i>Cohort study</i> —If applicable, explain how loss to follow-up was addressed<br><i>Case-control study</i> —If applicable, explain how matching of cases and controls was addressed<br><i>Cross-sectional study</i> —If applicable, describe analytical methods taking account of sampling strategy                                                                                                                                                              |
|                           |         | 5     | (e) Describe any sensitivity analyses                                                                                                                                                                                                                                                                                                                                                                                                                                  |

1  
2  
3  
4  
5  
6  
7  
8  
9  
10  
11  
12  
13  
14  
15  
16  
17  
18  
19  
20  
21  
22  
23  
24  
25  
26  
27  
28  
29  
30  
31  
32  
33  
34  
35  
36  
37  
38  
39  
40  
41  
42  
43  
44  
45  
46  
47  
48  
49  
50  
51  
52  
53  
54  
55  
56  
57  
58  
59  
60

Continued on next page

For peer review only



| <b>Results</b>           |     |                                                                                                                                                                                                                                                                                                                                                                                                               | <b>Page</b>       |
|--------------------------|-----|---------------------------------------------------------------------------------------------------------------------------------------------------------------------------------------------------------------------------------------------------------------------------------------------------------------------------------------------------------------------------------------------------------------|-------------------|
| Participants             | 13* | (a) Report numbers of individuals at each stage of study—eg numbers potentially eligible, examined for eligibility, confirmed eligible, included in the study, completing follow-up, and analysed<br>(b) Give reasons for non-participation at each stage<br>(c) Consider use of a flow diagram                                                                                                               | 6<br><br>Figure 1 |
| Descriptive data         | 14* | (a) Give characteristics of study participants (eg demographic, clinical, social) and information on exposures and potential confounders<br>(b) Indicate number of participants with missing data for each variable of interest<br>(c) <i>Cohort study</i> —Summarise follow-up time (eg, average and total amount)                                                                                           | 6<br>6            |
| Outcome data             | 15* | <i>Cohort study</i> —Report numbers of outcome events or summary measures over time<br><i>Case-control study</i> —Report numbers in each exposure category, or summary measures of exposure<br><i>Cross-sectional study</i> —Report numbers of outcome events or summary measures                                                                                                                             | 6                 |
| Main results             | 16  | (a) Give unadjusted estimates and, if applicable, confounder-adjusted estimates and their precision (eg, 95% confidence interval). Make clear which confounders were adjusted for and why they were included<br>(b) Report category boundaries when continuous variables were categorized<br>(c) If relevant, consider translating estimates of relative risk into absolute risk for a meaningful time period | 6-7<br>6-7        |
| Other analyses           | 17  | Report other analyses done—eg analyses of subgroups and interactions, and sensitivity analyses                                                                                                                                                                                                                                                                                                                | 6-7               |
| <b>Discussion</b>        |     |                                                                                                                                                                                                                                                                                                                                                                                                               |                   |
| Key results              | 18  | Summarise key results with reference to study objectives                                                                                                                                                                                                                                                                                                                                                      | 7                 |
| Limitations              | 19  | Discuss limitations of the study, taking into account sources of potential bias or imprecision. Discuss both direction and magnitude of any potential bias                                                                                                                                                                                                                                                    | 8                 |
| Interpretation           | 20  | Give a cautious overall interpretation of results considering objectives, limitations, multiplicity of analyses, results from similar studies, and other relevant evidence                                                                                                                                                                                                                                    | 7                 |
| Generalisability         | 21  | Discuss the generalisability (external validity) of the study results                                                                                                                                                                                                                                                                                                                                         | 8                 |
| <b>Other information</b> |     |                                                                                                                                                                                                                                                                                                                                                                                                               |                   |
| Funding                  | 22  | Give the source of funding and the role of the funders for the present study and, if applicable, for the original study on which the present article is based                                                                                                                                                                                                                                                 | 10                |

\*Give information separately for cases and controls in case-control studies and, if applicable, for exposed and unexposed groups in cohort and cross-sectional studies.

**Note:** An Explanation and Elaboration article discusses each checklist item and gives methodological background and published examples of transparent reporting. The STROBE checklist is best used in conjunction with this article (freely available on the Web sites of PLoS Medicine at <http://www.plosmedicine.org/>, Annals of Internal Medicine at <http://www.annals.org/>, and Epidemiology at <http://www.epidem.com/>). Information on the STROBE Initiative is available at [www.strobe-statement.org](http://www.strobe-statement.org).
